# Supplementary material for: What potential research participants want to know about research: a systematic review
Source: PubMed Central journal article supplement — BMJ Open. 2012 May 30;2(3):e000509. doi: 10.1136/bmjopen-2011-000509 (PMC3367142; doi:10.1136/bmjopen-2011-000509), 2012-05-30

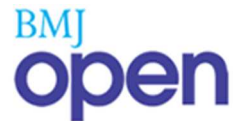

## What patients really want to know about research: a systematic review

|                                 |                                                                                                                                                                                                                                                                                                                                                                                                                                                                                                               |
|---------------------------------|---------------------------------------------------------------------------------------------------------------------------------------------------------------------------------------------------------------------------------------------------------------------------------------------------------------------------------------------------------------------------------------------------------------------------------------------------------------------------------------------------------------|
| Journal:                        | <i>BMJ Open</i>                                                                                                                                                                                                                                                                                                                                                                                                                                                                                               |
| Manuscript ID:                  | bmjopen-2011-000509                                                                                                                                                                                                                                                                                                                                                                                                                                                                                           |
| Article Type:                   | Research                                                                                                                                                                                                                                                                                                                                                                                                                                                                                                      |
| Date Submitted by the Author:   | 15-Dec-2011                                                                                                                                                                                                                                                                                                                                                                                                                                                                                                   |
| Complete List of Authors:       | Kirkby, Helen; The University of Birmingham, MRC Midlands Hub for Trials Methodology Research (HTMR)<br>Calvert, Melanie; The University of Birmingham, MRC Midlands Hub for Trials Methodology Research (HTMR)<br>Draper, Heather; The University of Birmingham, Centre for Biomedical Ethics<br>Keeley, Thomas; The University of Birmingham, MRC Midlands Hub for Trials Methodology Research (HTMR)<br>Wilson, Sue; The University of Birmingham, MRC Midlands Hub for Trials Methodology Research (HTMR) |
| <b>Primary Subject Heading</b>: | Ethics                                                                                                                                                                                                                                                                                                                                                                                                                                                                                                        |
| Secondary Subject Heading:      | Ethics                                                                                                                                                                                                                                                                                                                                                                                                                                                                                                        |
| Keywords:                       | MEDICAL ETHICS, ETHICS (see Medical Ethics), GENERAL MEDICINE (see Internal Medicine)                                                                                                                                                                                                                                                                                                                                                                                                                         |
|                                 |                                                                                                                                                                                                                                                                                                                                                                                                                                                                                                               |

SCHOLARONE™  
Manuscripts

only

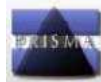

# PRISMA 2009 Checklist

| Section/topic                      | #  | Checklist item                                                                                                                                                                                                                                                                                              | Reported on page # |
|------------------------------------|----|-------------------------------------------------------------------------------------------------------------------------------------------------------------------------------------------------------------------------------------------------------------------------------------------------------------|--------------------|
| <b>TITLE</b>                       |    |                                                                                                                                                                                                                                                                                                             |                    |
| Title                              | 1  | Identify the report as a systematic review, meta-analysis, or both.                                                                                                                                                                                                                                         | 3                  |
| <b>ABSTRACT</b>                    |    |                                                                                                                                                                                                                                                                                                             |                    |
| Structured summary                 | 2  | Provide a structured summary including, as applicable: background; objectives; data sources; study eligibility criteria, participants, and interventions; study appraisal and synthesis methods; results; limitations; conclusions and implications of key findings; systematic review registration number. | 3-5                |
| <b>INTRODUCTION</b>                |    |                                                                                                                                                                                                                                                                                                             |                    |
| Rationale                          | 3  | Describe the rationale for the review in the context of what is already known.                                                                                                                                                                                                                              | 6-7                |
| Objectives                         | 4  | Provide an explicit statement of questions being addressed with reference to participants, interventions, comparisons, outcomes, and study design (PICOS).                                                                                                                                                  | 7; 8               |
| <b>METHODS</b>                     |    |                                                                                                                                                                                                                                                                                                             |                    |
| Protocol and registration          | 5  | Indicate if a review protocol exists, if and where it can be accessed (e.g., Web address), and, if available, provide registration information including registration number.                                                                                                                               | 7                  |
| Eligibility criteria               | 6  | Specify study characteristics (e.g., PICOS, length of follow-up) and report characteristics (e.g., years considered, language, publication status) used as criteria for eligibility, giving rationale.                                                                                                      | 8                  |
| Information sources                | 7  | Describe all information sources (e.g., databases with dates of coverage, contact with study authors to identify additional studies) in the search and date last searched.                                                                                                                                  | 8                  |
| Search                             | 8  | Present full electronic search strategy for at least one database, including any limits used, such that it could be repeated.                                                                                                                                                                               | 20                 |
| Study selection                    | 9  | State the process for selecting studies (i.e., screening, eligibility, included in systematic review, and, if applicable, included in the meta-analysis).                                                                                                                                                   | 8-9; 10; 11        |
| Data collection process            | 10 | Describe method of data extraction from reports (e.g., piloted forms, independently, in duplicate) and any processes for obtaining and confirming data from investigators.                                                                                                                                  | 8-9                |
| Data items                         | 11 | List and define all variables for which data were sought (e.g., PICOS, funding sources) and any assumptions and simplifications made.                                                                                                                                                                       | 21                 |
| Risk of bias in individual studies | 12 | Describe methods used for assessing risk of bias of individual studies (including specification of whether this was done at the study or outcome level), and how this information is to be used in any data synthesis.                                                                                      | 18                 |
| Summary measures                   | 13 | State the principal summary measures (e.g., risk ratio, difference in means).                                                                                                                                                                                                                               | 9                  |
| Synthesis of results               | 14 | Describe the methods of handling data and combining results of studies, if done, including measures of consistency (e.g., $I^2$ ) for each meta-analysis.                                                                                                                                                   | 9                  |

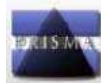

# PRISMA 2009 Checklist

Page 1 of 2

| Section/topic                 | #  | Checklist item                                                                                                                                                                                           | Reported on page # |
|-------------------------------|----|----------------------------------------------------------------------------------------------------------------------------------------------------------------------------------------------------------|--------------------|
| Risk of bias across studies   | 15 | Specify any assessment of risk of bias that may affect the cumulative evidence (e.g., publication bias, selective reporting within studies).                                                             | 18                 |
| Additional analyses           | 16 | Describe methods of additional analyses (e.g., sensitivity or subgroup analyses, meta-regression), if done, indicating which were pre-specified.                                                         | n/a                |
| <b>RESULTS</b>                |    |                                                                                                                                                                                                          |                    |
| Study selection               | 17 | Give numbers of studies screened, assessed for eligibility, and included in the review, with reasons for exclusions at each stage, ideally with a flow diagram.                                          | 11                 |
| Study characteristics         | 18 | For each study, present characteristics for which data were extracted (e.g., study size, PICOS, follow-up period) and provide the citations.                                                             | 12-13              |
| Risk of bias within studies   | 19 | Present data on risk of bias of each study and, if available, any outcome level assessment (see item 12).                                                                                                | 18                 |
| Results of individual studies | 20 | For all outcomes considered (benefits or harms), present, for each study: (a) simple summary data for each intervention group (b) effect estimates and confidence intervals, ideally with a forest plot. | 14-16              |
| Synthesis of results          | 21 | Present results of each meta-analysis done, including confidence intervals and measures of consistency.                                                                                                  | 14-16              |
| Risk of bias across studies   | 22 | Present results of any assessment of risk of bias across studies (see Item 15).                                                                                                                          | 18                 |
| Additional analysis           | 23 | Give results of additional analyses, if done (e.g., sensitivity or subgroup analyses, meta-regression [see Item 16]).                                                                                    | n/a                |
| <b>DISCUSSION</b>             |    |                                                                                                                                                                                                          |                    |
| Summary of evidence           | 24 | Summarize the main findings including the strength of evidence for each main outcome; consider their relevance to key groups (e.g., healthcare providers, users, and policy makers).                     | 17                 |
| Limitations                   | 25 | Discuss limitations at study and outcome level (e.g., risk of bias), and at review-level (e.g., incomplete retrieval of identified research, reporting bias).                                            | 18-19              |
| Conclusions                   | 26 | Provide a general interpretation of the results in the context of other evidence, and implications for future research.                                                                                  | 18-19              |
| <b>FUNDING</b>                |    |                                                                                                                                                                                                          |                    |
| Funding                       | 27 | Describe sources of funding for the systematic review and other support (e.g., supply of data); role of funders for the systematic review.                                                               | 23                 |

From: Moher D, Liberati A, Tetzlaff J, Altman DG, The PRISMA Group (2009). Preferred Reporting Items for Systematic Reviews and Meta-Analyses: The PRISMA Statement. PLoS Med 6(6): e1000097. doi:10.1371/journal.pmed1000097

For more information, visit: [www.prisma-statement.org](http://www.prisma-statement.org).

Page 2 of 2

For peer review only - <http://bmjopen.bmj.com/site/about/guidelines.xhtml>

UNIVERSITY OF  
BIRMINGHAM

MRC Midland Hub for Trials Methodology Research  
School of Health and Population Science  
College of Medical and Dental Sciences  
University of Birmingham  
Edgbaston  
Birmingham  
B15 2TT  
Hmk592@bham.ac.uk

The Editor  
British Medical Journal

19<sup>th</sup> October 2011

Dear Editor,

We hope that our paper entitled: **What patients really want to know about research: a systematic review** will be of general interest to your readership.

The paper reports a systematic review of what information potential participants want to know when they are deciding to participate in medical research compared to current guidance from the National Research Ethics Service (NRES). As a researcher, it is often difficult to decide how much information to include in a participant information sheet (PIS). PIS have become increasingly lengthy, especially for complex studies, and NRES guidance is not explicit in the level of detail recommended. This systematic review suggests that there is little evidence of what information potential participants want to know, but the available evidence shows that potential participants may have very different information needs. Our paper highlights the need for further research in this area and suggests a potential solution to tailored information provision.

We can confirm that the paper has not previously been published elsewhere. All authors declare they have no conflicts of interest and have read and approved this version of the manuscript. The requirements for authorship have been met by all authors.

Thank you for considering our work for publication.

Yours sincerely

Miss Helen Kirkby,  
MRC Midland Hub for Trials Methodology Research,  
School of Health and Population Science,  
University of Birmingham,  
Edgbaston,  
Birmingham,  
B15 2TT  
Tel: 0121 415 1038.

1  
2  
3  
4  
5  
6  
7  
8  
9  
10  
11  
12  
13  
14  
15  
16  
17  
18  
19  
20  
21  
22  
23  
24  
25  
26  
27  
28  
29  
30  
31  
32  
33  
34  
35  
36  
37  
38  
39  
40  
41  
42  
43  
44  
45  
46  
47  
48  
49  
50  
51  
52  
53  
54  
55  
56  
57  
58  
59  
60

|                                                                       |
|-----------------------------------------------------------------------|
| What patients really want to know about research: a systematic review |
|-----------------------------------------------------------------------|

|                                                                                 |
|---------------------------------------------------------------------------------|
| <b>Helen Kirkby, Melanie Calvert, Heather Draper, Thomas Keeley, Sue Wilson</b> |
|---------------------------------------------------------------------------------|

|                                                                                                                                                                         |
|-------------------------------------------------------------------------------------------------------------------------------------------------------------------------|
| MRC Midlands Hub for Trials Methodology Research (HTMR), School of Health and Population Science, University of Birmingham, Edgbaston, B15 2TT Helen Kirkby PhD student |
|-------------------------------------------------------------------------------------------------------------------------------------------------------------------------|

|                                                                                                                                                                                |
|--------------------------------------------------------------------------------------------------------------------------------------------------------------------------------|
| MRC Midlands Hub for Trials Methodology Research (HTMR), School of Health and Population Science, University of Birmingham, Edgbaston, B15 2TT Melanie Calvert Senior Lecturer |
|--------------------------------------------------------------------------------------------------------------------------------------------------------------------------------|

|                                                                                                                                                                                                   |
|---------------------------------------------------------------------------------------------------------------------------------------------------------------------------------------------------|
| Centre for Biomedical Ethics, Primary Care Clinical Sciences, School of Health and Population Science, University of Birmingham, Edgbaston, B15 2TT Heather Draper Professor of Biomedical Ethics |
|---------------------------------------------------------------------------------------------------------------------------------------------------------------------------------------------------|

|                                                                                                                                                                          |
|--------------------------------------------------------------------------------------------------------------------------------------------------------------------------|
| MRC Midlands Hub for Trials Methodology Research (HTMR), School of Health and Population Science, University of Birmingham, Edgbaston, B15 2TT Thomas Keeley PhD student |
|--------------------------------------------------------------------------------------------------------------------------------------------------------------------------|

|                                                                                                                                                                                              |
|----------------------------------------------------------------------------------------------------------------------------------------------------------------------------------------------|
| MRC Midlands Hub for Trials Methodology Research (HTMR), School of Health and Population Science, University of Birmingham, Edgbaston, B15 2TT Sue Wilson Professor of Clinical Epidemiology |
|----------------------------------------------------------------------------------------------------------------------------------------------------------------------------------------------|

|                                                                                    |
|------------------------------------------------------------------------------------|
| <b>Correspondence to: <a href="mailto:hmk592@bham.ac.uk">hmk592@bham.ac.uk</a></b> |
|------------------------------------------------------------------------------------|

## **ABSTRACT**

### **Objective**

To establish the evidence base for the information that participants want to know about medical research and to assess how this relates to current guidance from the National Research Ethics Service (NRES).

### **Data Sources**

Medline, Web of Science, Applied Social Sciences Index and Abstracts (ASSIA), Sociological abstracts, Health Management Information Consortium (HMIC), Cochrane library, thesis index's, grey literature databases, reference and cited article lists, key journals, Google Scholar and correspondence with expert authors.

### **Study selection**

Original research studies published between 1950 and October 2010 that asked potential participants to indicate how much or what type of information they wanted to be told about a research study or asked them to rate the importance of a specific piece of information were included.

### **Study appraisal and synthesis methods**

Studies were appraised based on the generalisability of results to the UK potential research participant population. A meta-data analysis using basic thematic analysis was used to split results from papers into themes based on the sections of information that NRES recommends should be included in a participant information sheet.

### **Results**

1  
2  
3 14 studies were included. Of the 20 pieces of information that NRES recommend  
4 should be included in patient information sheets for research pooled proportions  
5 could be calculated for seven themes. Results showed that potential participants  
6  
7 wanted to be offered information about result dissemination (91% [95% CI 85%;  
8 95%]), investigator conflicts of interest (48% [95% CI 27%;69%]), the purpose of the  
9 study (76% [95% CI 27%;100%]), voluntariness (39% [95% CI 2%; 100%]), how long  
10 the research would last (61% [95% CI 16%;97%]), potential benefits (57% [95% CI  
11 7%; 98%]) and confidentiality (44% [95% CI 10%; 82%]). The level of detail  
12 participants wanted to know was not explored comprehensively in the studies. There  
13 was no evidence to support the level of information provision required by participants  
14 on the remaining 7 items.  
15  
16  
17  
18  
19  
20  
21  
22  
23  
24  
25  
26  
27  
28  
29

### 30 **Conclusions**

31 There is limited evidence on what potential participants want to know about  
32 research. The existing evidence suggests that individuals may have very different  
33 needs and a more tailored evidence based approach may be necessary.  
34  
35  
36  
37  
38  
39  
40  
41  
42  
43  
44  
45  
46  
47  
48  
49  
50  
51  
52  
53  
54  
55  
56  
57  
58  
59  
60

## Article Summary

### Article Focus:

- What information do potential participants want to know when they are deciding whether to take part in research?
- What is the established evidence base?
- How does the current evidence base relate to current guidance from the National Research Ethics Service (NRES)?

### Key messages:

- There is little evidence of what information potential participants want to know about research when they are making the decision to take part.
- The limited evidence available suggests that potential participants may have very different information needs.
- Further research is required to determine what potential participants really want to know about research and how this can be delivered in a way that takes into account their different informational needs.

### Study Strengths:

- An extensive search strategy ensured the review was systematic in capturing all available evidence.

### Study Limitations:

- Papers included in the review differed in their methodologies and presentation of results, making comparisons between papers extremely difficult.



## Introduction

Medical research is central to the advancement of treatments, services and technology.<sup>1-3</sup> Potential participants have the right to choose whether they participate in medical research<sup>4,5</sup> and individuals must give their consent prior to participating in research. As part of this ongoing process, potential participants must be provided with sufficient information to make a voluntary and informed decision.<sup>2,6-</sup>

<sup>11</sup> In research settings, study information is usually conveyed to potential participants in the form of a written participant information sheet (PIS), which is later reinforced by a verbal consent interview with a member of the research team.<sup>12</sup>

In the UK, the National Research Ethics Service (NRES) provides extensive guidance on how a PIS should be written and presented. The guidance suggests that a PIS should be split into two parts where part one provides a brief and clear explanation of the essential elements of the specific study and allows participants to make an initial choice of whether the study is of interest. Part two should then contain additional information on matters such as confidentiality, indemnity and publication intentions.

There is some concern that PIS have become increasingly lengthy over recent years.<sup>13-15</sup> Complex studies, for example where the potential participant might, e.g. on the basis of test results be invited to participate in a further phase of the study, often use detailed and lengthy PIS's. This can lead to poor understanding by participants<sup>16-18</sup> and a corresponding concern that consent criteria are not always met. NRES guidance is not explicit in the level of detail to be included in a PIS and

1  
2  
3 there is disagreement amongst experts about how much information to include.<sup>19</sup> If  
4  
5 PIS's become so complex that only the most confident and educated participants are  
6  
7 able to digest all the information, this may result in selection bias meaning that  
8  
9 research is less generalisable.<sup>20</sup> Further, there is a risk that healthcare researchers  
10  
11 are becoming increasingly paternalistic in their information provision without  
12  
13 recognising individual participant needs. In order to help address the problem of  
14  
15 how much information to include in a PIS, we conducted a systematic review that  
16  
17 aimed to establish the evidence base for the information that potential participants  
18  
19 want to know when they are deciding about participation.  
20  
21  
22  
23  
24  
25  
26  
27  
28  
29  
30  
31  
32  
33  
34  
35  
36  
37  
38  
39  
40  
41  
42  
43  
44  
45  
46  
47  
48  
49  
50  
51  
52  
53  
54  
55  
56  
57  
58  
59  
60

## Methods

### Selection Criteria and Literature Search

This systematic review included all studies that asked participants to indicate how much or what type of information they wanted to be told about a research study, or asked them to rate the importance of a specific piece of information. We included studies published between 1950 and 27<sup>th</sup> October 2010 with no limit to language or participant group. We only included studies of participant opinion and excluded studies of health care professional or other expert opinion.

We combined Mesh terms Patient, Research Subjects, Consent forms, Informed Consent and Research ethics with terms relating to information provision (Appendix 1). We conducted searches in Medline, Web of Science, ASSIA, Sociological abstracts, HMIC and the Cochrane Library electronic databases. We also searched thesis index's, grey Literature databases, reference and cited article lists, key journals and Google Scholar and we asked expert authors to identify relevant studies.

### Data Extraction and Synthesis

One researcher (HK) extracted data from papers using a pre defined data extraction sheet and a second researcher (TK) checked it for accuracy with disagreements resolved by discussion between these two authors (

1  
2  
3 Table 1). A meta data analysis using basic thematic analysis was used to split  
4  
5 results from the 14 papers into themes based on the sections of information that  
6  
7 NRES recommends should be included in a PIS (with very similar headings  
8  
9 combined to make one variable) (Table 2).<sup>10</sup> We coded individual results based on  
10  
11 their relevance to each theme and then collated themes to report overall results. For  
12  
13 themes where more than one quantitative study reported a proportion of participants  
14  
15 wanting to know the information, pooled proportions with random effects were  
16  
17 calculated using StatsDirect statistical software (StatsDirect Ltd, UK).  
18  
19  
20  
21  
22  
23  
24  
25  
26  
27  
28  
29  
30  
31  
32  
33  
34  
35  
36  
37  
38  
39  
40  
41  
42  
43  
44  
45  
46  
47  
48  
49  
50  
51  
52  
53  
54  
55  
56  
57  
58  
59  
60

## Results

The search yielded 11943 unique references. We discarded 11291 after reviewing the title, 620 after reviewing the abstract and a further 18 after reviewing the full paper (**Error! Reference source not found.**). HK conducted the citation screening and TK independently validated approximately 10% of the references identified from electronic databases (96.4% agreement rate).

For peer review only

TABLE 1 - SUMMARY OF STUDIES INCLUDED IN THE SYSTEMATIC REVIEW

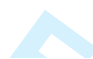

| Lead author / Country / Year              | Inclusion/exclusion criteria                                                                                                                                                                                                            | Participant illness    | Total number of participants (response rate)         | Study design                                  | Sampling strategy                                    | Analysis                                                                                                       | Key Themes explored                                                                                 |
|-------------------------------------------|-----------------------------------------------------------------------------------------------------------------------------------------------------------------------------------------------------------------------------------------|------------------------|------------------------------------------------------|-----------------------------------------------|------------------------------------------------------|----------------------------------------------------------------------------------------------------------------|-----------------------------------------------------------------------------------------------------|
| Walkup <sup>21</sup><br>USA<br>2009       | None provided                                                                                                                                                                                                                           | None                   | 57 (not provided)                                    | Exploration of conversation and questionnaire | Convenience                                          | Descriptive summary statistics                                                                                 | Study purpose, voluntariness, study method, risks, benefits, confidentiality, review board approval |
| Bento <sup>22</sup><br>Brazil<br>2007     | Female participants aged 18-49 who had taken part in a clinical trial of women's health in the previous 12 months and lived in Metropolitan area of Campinas, Sao Paulo, Brazil                                                         | Women's health         | 51 participants<br>8 focus groups<br>(not provided)  | Focus groups                                  | Convenience                                          | Framework analysis                                                                                             | Study methods, risks and benefits                                                                   |
| Hutchinson<br>Australia<br>2008           | Participants of clinical trials of COPD, asthma, diabetes, osteoporosis, rheumatoid arthritis and the influenza vaccine. Excluded if clinical trial for acute, life threatening or debilitating conditions with inadequate therapy      | Chronic illness        | 259/324 (80%)                                        | Questionnaire                                 | Convenience                                          | Descriptive summary statistics and multivariate logistic regression                                            | Conflicts of Interest (Col)/organisation and funding of the research                                |
| Gray <sup>23</sup><br>USA<br>2007         | Participants enrolled onto a phase I research trial, spoke English, and were medically and mentally capable of participating                                                                                                            | Phase I research trial | 102/119 (86%)                                        | Questionnaire                                 | Consecutive participants enrolling onto parent trial | Descriptive summary statistics, Chi squared tests and Multivariate logistic regression                         | Conflicts of Interest (Col)/organisation and funding of the research                                |
| Fernandez <sup>24</sup><br>Canada<br>2007 | English speaking adolescent with cancer or parents of children with cancer. Excluded acutely unwell or recently relapsed                                                                                                                | Cancer                 | 40/43 - 10 adolescent, 30 parent participants, (93%) | Questionnaire                                 | Random                                               | Descriptive summary statistics and Chi squared tests                                                           | Return of study results                                                                             |
| Grady <sup>25</sup><br>USA<br>2006        | Participants of HIV, Hepatitis, Arthritis and Surgical Oncology Trials who were >18 years and English speaking                                                                                                                          | Various                | 33 (not provided)                                    | Face to face semi structured interviews       | Convenience                                          | Transcripts coded and themes and major concepts identified                                                     | Conflicts of Interest (Col)/organisation and funding of the research                                |
| Hampson <sup>26</sup><br>USA<br>2006      | Participants with cancer and enrolled in a clinical trial who were English speaking and >18 years                                                                                                                                       | Cancer                 | 252/272 (93%)                                        | Structured face to face interviews            | Not provided                                         | Descriptive summary statistics and Fishers exact test / Kruskal-Wallis test                                    | Conflicts of Interest (Col)/organisation and funding of the research                                |
| Weinfurt <sup>27</sup><br>USA<br>2006     | Healthy adults or those with a mild chronic illness. Excluded if they had participated in another focus group within the previous 6 months or were working or had worked for an organisation involved in the conduct of clinical trials | Healthy                | 16 focus groups<br>(not provided)                    | Focus groups                                  | Convenience                                          | Initial content codes based on transcripts developed that were summarised and reviewed to identify main themes | Conflicts of Interest (Col)/organisation and funding of the research                                |
| Partridge <sup>28</sup><br>USA<br>2005    | All participants of the parent trial (chemotherapy trial)                                                                                                                                                                               | Cancer                 | 94/135 (69.6%)                                       | Questionnaire                                 | Convenience                                          | Simple descriptive statistics                                                                                  | Return of study results                                                                             |
| Kim <sup>29</sup>                         | Potential research participants >18 years,                                                                                                                                                                                              | Various                | 5478/20205                                           | Online                                        | Random                                               | 2-way ANOVA modified                                                                                           | Conflicts of Interest                                                                               |

|    |                         |                                            |              |               |                 |             |                          |                                |
|----|-------------------------|--------------------------------------------|--------------|---------------|-----------------|-------------|--------------------------|--------------------------------|
| 1  |                         |                                            |              |               |                 |             |                          |                                |
| 2  |                         |                                            |              |               |                 |             |                          |                                |
| 3  |                         |                                            |              |               |                 |             |                          |                                |
| 4  |                         |                                            |              |               |                 |             |                          |                                |
| 5  | USA                     | diagnosed with heart disease, breast       |              | (27%)         | questionnaire   |             | for ordinal data and     | (Col)/organisation and         |
| 6  | 2004                    | cancer or depression, and listed on the    |              |               |                 |             | multinomial logistic     | funding of the research        |
| 7  |                         | Harris Interactive Chronic Illness         |              |               |                 |             | regression               |                                |
| 8  |                         | Database                                   |              |               |                 |             |                          |                                |
| 9  | Partridge <sup>30</sup> | Any participant enrolled into the parent   | Cancer       | 51/55 (93%)   | Questionnaire   | Convenience | Simple descriptive       | Return of study results        |
| 10 | USA                     | study (chemotherapy trial)                 |              |               |                 |             | statistics               |                                |
| 11 | 2003                    |                                            |              |               |                 |             |                          |                                |
| 12 | Casarett <sup>31</sup>  | Participants with a current telephone      | Chronic pain | 40/86 (46.5%) | Semi structured | Convenience | Descriptive summary      | Voluntariness, study methods,  |
| 13 | USA                     | number, enrolled at a pain clinic, who had |              |               | telephone       |             | statistics and Bivariate | expenses, risks and the        |
| 14 | 2001                    | chronic non-malignant pain, were taking    |              |               | interviews      |             | analysis with non-       | drug/device/procedure being    |
| 15 |                         | scheduled opioids and had experienced      |              |               |                 |             | parametric tests         | tested                         |
| 16 |                         | the pain for at least 6 months             |              |               |                 |             |                          |                                |
| 17 | Maslin <sup>32</sup>    | Attending a breast unit and were patients  | Cancer       | 213/300 (71%) | Postal          | Random      | Simple descriptive       | Study purpose, voluntariness,  |
| 18 | UK                      | with a breast cancer diagnosis or          |              |               | questionnaire   |             | statistics               | study methods, risks, benefits |
| 19 | 1994                    | asymptomatic women with a family history   |              |               |                 |             |                          | and confidentiality            |
| 20 |                         | of breast cancer                           |              |               |                 |             |                          |                                |
| 21 | Sand <sup>33</sup>      | Participants eligible for the parent study | Cancer       | 21/33 (64%)   | Semi structured | Convenience | Identification and       | Voluntariness, study methods   |
| 22 | Norway                  | (all lung cancer patients)                 |              |               | interviews      |             | categorisation of        | and treatment alternatives     |
| 23 | 2008                    |                                            |              |               |                 |             | themes and analysis      |                                |
| 24 |                         |                                            |              |               |                 |             | based on deductive and   |                                |
| 25 |                         |                                            |              |               |                 |             | inductive categories     |                                |
| 26 |                         |                                            |              |               |                 |             |                          |                                |
| 27 |                         |                                            |              |               |                 |             |                          |                                |
| 28 |                         |                                            |              |               |                 |             |                          |                                |
| 29 |                         |                                            |              |               |                 |             |                          |                                |
| 30 |                         |                                            |              |               |                 |             |                          |                                |
| 31 |                         |                                            |              |               |                 |             |                          |                                |
| 32 |                         |                                            |              |               |                 |             |                          |                                |
| 33 |                         |                                            |              |               |                 |             |                          |                                |
| 34 |                         |                                            |              |               |                 |             |                          |                                |
| 35 |                         |                                            |              |               |                 |             |                          |                                |
| 36 |                         |                                            |              |               |                 |             |                          |                                |
| 37 |                         |                                            |              |               |                 |             |                          |                                |
| 38 |                         |                                            |              |               |                 |             |                          |                                |
| 39 |                         |                                            |              |               |                 |             |                          |                                |
| 40 |                         |                                            |              |               |                 |             |                          |                                |
| 41 |                         |                                            |              |               |                 |             |                          |                                |
| 42 |                         |                                            |              |               |                 |             |                          |                                |
| 43 |                         |                                            |              |               |                 |             |                          |                                |
| 44 |                         |                                            |              |               |                 |             |                          |                                |
| 45 |                         |                                            |              |               |                 |             |                          |                                |
| 46 |                         |                                            |              |               |                 |             |                          |                                |
| 47 |                         |                                            |              |               |                 |             |                          |                                |
| 48 |                         |                                            |              |               |                 |             |                          |                                |
| 49 |                         |                                            |              |               |                 |             |                          |                                |

TABLE 2 – EVIDENCE LINKED TO NRES PARTICIPANT INFORMATION SHEET RECOMMENDED HEADINGS

| NRES Heading                                                                           | What does NRES say should be included?                                                                                                                                                                                    | N studies               | Evidence for inclusion in PIS from literature                                                                                                                                                                                                                                                                                                                                                                                                                                                                                                                                                                                                                                                                                                                                                                                                                    |
|----------------------------------------------------------------------------------------|---------------------------------------------------------------------------------------------------------------------------------------------------------------------------------------------------------------------------|-------------------------|------------------------------------------------------------------------------------------------------------------------------------------------------------------------------------------------------------------------------------------------------------------------------------------------------------------------------------------------------------------------------------------------------------------------------------------------------------------------------------------------------------------------------------------------------------------------------------------------------------------------------------------------------------------------------------------------------------------------------------------------------------------------------------------------------------------------------------------------------------------|
| What is the purpose of the study?                                                      | Purpose is an important consideration for subjects and should be included                                                                                                                                                 | 2 <sup>21,32</sup>      | Pooled results showed that 76% (95% CI 27%;100%) participants wanted to know about study purpose                                                                                                                                                                                                                                                                                                                                                                                                                                                                                                                                                                                                                                                                                                                                                                 |
| Why have I been invited?                                                               | Why and how participants have been chosen and how many will be in the study                                                                                                                                               | 0                       | No evidence                                                                                                                                                                                                                                                                                                                                                                                                                                                                                                                                                                                                                                                                                                                                                                                                                                                      |
| Do I have to take part? / What will happen if I don't want to carry on with the study? | The voluntary nature of the research should be included                                                                                                                                                                   | 4 <sup>21,31,33</sup>   | Pooled results from the 3 quantitative studies <sup>21,31,32</sup> showed that 39% (95% CI 2%; 100%) participants wanted to know about voluntariness<br><br>The one qualitative study reported that it was the most important piece of information to be included in a participant information sheet <sup>33</sup>                                                                                                                                                                                                                                                                                                                                                                                                                                                                                                                                               |
| What will happen to me if I take part? / What will I have to do?                       | How long the participant will be involved in the research / how long the research will last                                                                                                                               | 3 <sup>21,31,32</sup>   | Pooled results from all three studies <sup>21,31,32</sup> showed that 61% (95% CI 16%;97%) participants wanted to know how long the research would last                                                                                                                                                                                                                                                                                                                                                                                                                                                                                                                                                                                                                                                                                                          |
|                                                                                        | How often they need to attend a clinic                                                                                                                                                                                    | 1 <sup>31</sup>         | 68% (27/40; 95% CI 53%;82%) wanted to know the frequency of additional study visits <sup>31</sup>                                                                                                                                                                                                                                                                                                                                                                                                                                                                                                                                                                                                                                                                                                                                                                |
|                                                                                        | How long visits will be                                                                                                                                                                                                   | 0                       | No evidence                                                                                                                                                                                                                                                                                                                                                                                                                                                                                                                                                                                                                                                                                                                                                                                                                                                      |
|                                                                                        | Exactly what will happen to them                                                                                                                                                                                          | 2 <sup>31,33</sup>      | Specific information types varied considerably between studies, so no meaningful pooled results could be calculated<br><br>The proportion of people wanting to know what would happen to them ranged from 9.5% (2/21; 95% CI 0%;22.1%) <sup>33</sup> to 20% (8/40; 95%CI 7.6%;32.4%) <sup>31</sup> depending on what the specific information was. For example, 20% (8/40; 95% CI 7.6%;32.4%) wanted to know about burdens to friends or family caused by study participation, <sup>31</sup> 12% (5/40; 95% CI 2.3%;22.8%) wanted to know how much work they would miss because of study participation, <sup>31</sup> 10% (4/40; 95% CI 0.7%;19.3%) wanted to know how much time would be spent waiting in clinic during study visits, <sup>31</sup> and 9.5% (2/21; 95% CI -3%;22.1%) wanted to know practical information about trial procedures <sup>33</sup> |
| Expenses and payments                                                                  | Expense claims available and if there is any kind of payment for participation                                                                                                                                            | 1 <sup>31</sup>         | 25% (10/40; 95% CI 11.6%;38.4%) wanted to know if free medication would be available during or after trial <sup>31</sup>                                                                                                                                                                                                                                                                                                                                                                                                                                                                                                                                                                                                                                                                                                                                         |
| What is the drug, device or procedure that is being tested?                            | Short description of the drug, device or procedure and give the stage of development, state the dosage of the drug and method of administration, and details of any contraindicated drugs included over the counter drugs | Two <sup>22,31</sup>    | The one quantitative study <sup>31</sup> showed that specific questions about the medication regime ranged from 25% (10/40; 95% CI 11.5%;38.4%) that wanted to know what control they had over medication dose during the study to 70% (28/40; 95% CI 55.8%;84.2%) that wanted to know the frequency with which study medication must be taken. <sup>31</sup> The study also showed that 62% (25/40; 95% CI 47.5%;77.5%) wanted results of previous studies of safety and 45% (18/40; 95% CI 29.5%;60.4%) of efficacy, and 15% (6/40; 95% CI 3.9%;26.1%) wanted to know if study medication had been approved for clinical use <sup>31</sup>                                                                                                                                                                                                                     |
| What are the alternatives for diagnosis or treatment?                                  | What other managements/treatments are available and a list of all important comparative risks and benefit                                                                                                                 | 1 <sup>33</sup>         | The one qualitative study showed that participants wanted to know how to use the intervention <sup>22</sup><br>5% (1/21; 95% CI 0%;13.9%) wanted as much information about treatment alternatives as they received about the study medication <sup>33</sup>                                                                                                                                                                                                                                                                                                                                                                                                                                                                                                                                                                                                      |
| What are the possible disadvantages and risks of                                       | Any risks, discomforts or inconvenience should be outlined                                                                                                                                                                | 4 <sup>21,32,1622</sup> | Specific information types varied considerably between studies so no meaningful pooled results could be calculated. Results ranged from no participants that asked about study risks (0/57) <sup>21</sup> to 97% (207/213; 95%                                                                                                                                                                                                                                                                                                                                                                                                                                                                                                                                                                                                                                   |



|    |                             |                                                            |                       |                                                                                                                      |
|----|-----------------------------|------------------------------------------------------------|-----------------------|----------------------------------------------------------------------------------------------------------------------|
| 1  |                             |                                                            |                       |                                                                                                                      |
| 2  |                             |                                                            |                       |                                                                                                                      |
| 3  |                             |                                                            |                       |                                                                                                                      |
| 4  |                             |                                                            |                       |                                                                                                                      |
| 5  | taking part? / What are the |                                                            |                       | CI 95%;99.4%) who wanted to be informed about any possible emotional or physical discomforts and side                |
| 6  | side effects of any         |                                                            |                       | effects <sup>32</sup>                                                                                                |
| 7  | treatment received when     |                                                            |                       |                                                                                                                      |
| 8  | taking part?                |                                                            |                       |                                                                                                                      |
| 9  | Radiation and the Ionizing  | If the use of additional ionizing radiation is required as | 0                     | No evidence                                                                                                          |
| 10 | Radiation Regulations       | part of the study then information must be given to the    |                       |                                                                                                                      |
| 11 |                             | participant on the radiation involved                      |                       |                                                                                                                      |
| 12 | Harm to the unborn child:   | Clear warnings must be given where there could be          | 0                     | No evidence                                                                                                          |
| 13 | therapeutic studies         | harm to an unborn child, if there was a risk in breast     |                       |                                                                                                                      |
| 14 |                             | feeding, or if taking the medication is likely to cause    |                       |                                                                                                                      |
| 15 |                             | fertility problems                                         |                       |                                                                                                                      |
| 16 | What are the possible       | Benefits should be included, but where there is no         | 3 <sup>21,22,32</sup> | Pooled results of the two quantitative studies <sup>21,32</sup> suggest that 57% (95% CI 7%; 98%) wanted to know     |
| 17 | benefits of taking part?    | intended clinical benefit it should be stated clearly      |                       | about study benefits                                                                                                 |
| 18 |                             |                                                            |                       | Two studies provided relevant data relating to specific benefits. <sup>31,33</sup> Specific requests ranged from 14% |
| 19 |                             |                                                            |                       | (3/21; 95% CI -0.7%;29.3%) that wanted to know about hopes for better treatment <sup>33</sup> to 55% (22/40; 95% CI  |
| 20 |                             |                                                            |                       | 39.5%;70.4%) that wanted an opportunity to learn about condition or medication under study. <sup>31</sup> Specific   |
| 21 | What happens when the       | Arrangements for after the trial finishes must be given,   | 1 <sup>31</sup>       | information types varied considerably between studies so no meaningful pooled results could be calculated            |
| 22 | research study stops?       | and it must be clear if participants will have continued   |                       | 55% (22/40; 95% CI 39.6%;70.4%) wanted to know about the availability of medication after the study was              |
| 23 |                             | access to any benefits or intervention they may have       |                       | over <sup>31</sup>                                                                                                   |
| 24 |                             | obtained during the research. If treatment will not be     |                       |                                                                                                                      |
| 25 |                             | available after the study, it should be explained what     |                       |                                                                                                                      |
| 26 |                             | treatment will be available instead                        |                       |                                                                                                                      |
| 27 | What if there is a          | How complaints will be handled and what redress may        | 0                     | No evidence                                                                                                          |
| 28 | problem?                    | be available                                               |                       |                                                                                                                      |
| 29 | Will my taking part in the  | How data will be collected, stored, what it will be used   | 2 <sup>21,32</sup>    | Pooled results showed that 44% (95% CI 10%; 82%) participants wanted to be given information about                   |
| 30 | study be kept confidential? | for, who will have access to it, how long it will be       |                       | confidentiality and the protection of their privacy                                                                  |
| 31 |                             | retained for and how it will be disposed of                |                       |                                                                                                                      |
| 32 | Involvement of the          | If the participants GP needs to be notified of             | 0                     | No evidence                                                                                                          |
| 33 | GP/family doctor            | involvement or asked for consent                           |                       |                                                                                                                      |
| 34 | What will happen to any     | Clear description of whether new samples will be           | 0                     | No evidence                                                                                                          |
| 35 | samples I give?             | taken, if excess samples will be taken, and if access to   |                       |                                                                                                                      |
| 36 |                             | existing stored samples will be required. The same         |                       |                                                                                                                      |
| 37 |                             | type of information as for data is required to be          |                       |                                                                                                                      |
| 38 | Will any genetic tests be   | A separate consent form for genetic studies should be      | 0                     | No evidence                                                                                                          |
| 39 | done?                       | used                                                       |                       |                                                                                                                      |
| 40 | What will happen to the     | What will happen to the results of the research, if it is  | 3 <sup>24,28,30</sup> | Pooled results showed that 91% (95% CI 85%; 95%) wanted to know about study results                                  |
| 41 | results of the research     | intended to be published and how results will be made      |                       |                                                                                                                      |
| 42 | study?                      | available to participants, and that they will not be       |                       | Specific information types varied considerably between studies, so no meaningful pooled results could be             |

1  
2  
3  
4  
5  
6  
7  
8  
9  
10  
11  
12  
13  
14  
15  
16  
17  
18  
19  
20  
21  
22  
23  
24  
25  
26  
27  
28  
29  
30  
31  
32  
33  
34  
35  
36  
37  
38  
39  
40  
41  
42  
43  
44  
45  
46  
47  
48  
49

identified in any publication

calculated . Two studies provided relevant data relating to specific aspects of what they wanted to know about results.<sup>24,30</sup> 78% (31/40; 95% CI 64.6%;90.4%) of participants wanted a description of what researchers had learned that was important,<sup>24</sup> 35% (14/40; 95% CI 20.2%;49.8%) wanted it to include follow up contacts for the researcher<sup>24</sup> and 98% (29/40; 95% CI 58.7%; 86.3%) wanted a list of medical publications written as a results of the research.<sup>24</sup> 90% (46/51; 95% CI 82%;98.4%) wanted their family or loved ones to be informed of the results if they were unable to learn them<sup>30</sup>

Who is organising and funding the research? The organization or company sponsoring the research and funding the research if these are different, and if the researcher conducting the research is being paid

6<sup>23,25-27,29,34</sup>

Pooled results from the four quantitative studies showed that 48% (95% CI 27%;69%) wanted to know about any type of Col, but there was general disagreement over whether patients wanted to be told about financial Col

3 studies provided relevant data relating to what participants wanted to know about specific aspects of Col.<sup>26,29,34</sup> When financial Col were broken down into subcategories, 82.5% (4519/5478; 95% CI 81.48%;83.5%) wanted to be told about commercial funding,<sup>29</sup> 69% (3779/5478; 95% CI 67.8%;70.2%) about personal income,<sup>29</sup> between 41% (105/259; 95% CI 34.6%;46.5%) and 82% (4492/5478; 95% CI 81%;83%) about patents and stocks and shares<sup>29,34</sup> and 40% (101/253; 95% CI 34%;46%) thought researchers should have told participants only about the oversight system<sup>26</sup>

One study reported that participants wanted to know specifically how money was spent, with proportions ranging from 25% (65/259; 95% CI 19.8%;30.4%) that wanted to know how much of the funding was spent on administration<sup>34</sup> to 38% (98/259; 95% CI 31.9%;43.8%) that wanted to know how spare accrued funds were used at study completion<sup>34</sup>

One qualitative study reported that participants wanted to know the name of the sponsor<sup>27</sup> and one quantitative study reported that 57% (148/259; 95% CI 51.1%;63.2%)<sup>34</sup> wanted to know the name of the funder

Some participants wanted help understanding the potential consequences of Col, some did not<sup>27</sup>

Specific information types varied considerably between studies so no meaningful pooled results could not be calculated

Who has reviewed the study? Explain the role of the Research Ethics Committees and which Committee reviewed the current study

1<sup>21</sup>

No participants asked about institutional review board approval (0/57)<sup>21</sup>

1  
2  
3 Of the 14 studies included in the review, three specifically considered the return of  
4 research results to participants and six considered only investigator conflicts of  
5 interest (Col). Five studies looked broadly at what information potential research  
6 participants wanted to know.  
7  
8  
9  
10

11  
12  
13  
14 Of the 20 sections of information NRES suggest should be included in a PIS, there  
15 were seven categories where no research evidence was identified that suggested  
16 what information research participants wanted to know (Table 2). We were able to  
17 calculate pooled proportions for seven themes. Participants wanted to be told about  
18 dissemination of study results (91% [95% CI 85%; 95%]), investigator conflicts of  
19 interest (48% [95% CI 27%;69%]), the purpose of the study (76% [95% CI  
20 27%;100%]), voluntariness (39% [95% CI 2%; 100%]), how long the research would  
21 last (61% [95% CI 16%;97%]), benefits (57% [95% CI 7%; 98%]) and confidentiality  
22 (44% [95% CI 10%; 82%]). Although the majority of participants appeared to want  
23 information for most of these themes, some participants did not, and the level of  
24 detail that participants wanted was not explored comprehensively.  
25  
26  
27  
28  
29  
30  
31  
32  
33  
34  
35  
36  
37  
38  
39  
40  
41  
42  
43  
44  
45  
46  
47  
48  
49  
50  
51  
52  
53  
54  
55  
56  
57  
58  
59  
60

## Discussion

Of the 14 papers that met inclusion criteria, five looked broadly at what information research participants wanted to know. These studies focused on the category of information required rather than how much detail participants wanted. All 14 studies had substantial limitations to generalisability when applied to the wider research population because, for example, they focused on specific sub sections of the population, e.g. six studies included only cancer patients<sup>24;26;28;30;32;33</sup> and only one study conducted in the UK.<sup>32</sup>

In the absence of evidence to suggest what information potential research participants want, NRES have based their guidance on expert opinion. It does, however, mean that current information provision for research may not adequately address the informational needs of the general population, or 'hard to reach' groups such as socially deprived or black and minority ethnic groups. Whilst NRES recognise that one size does not fit all and that low risk studies with little or no intervention may need shorter information sheets, there is little evidence to identify what level of information provision should be made.<sup>35</sup> A potential difficulty in conducting research to determine what should be included in a PIS is that an individual's information preferences may change as they move from being a potential to actual participant.<sup>36;37</sup>

Responding to individuals' information needs may prove challenging, but the provision of high quality, appropriate information in a timely manner is crucial to the consent process. Electronic information provision may be one way to address different information needs. Recent research by Antoniou *et al.*<sup>38</sup> that allowed

1  
2  
3 participants to access three increasingly detailed levels of information electronically,  
4  
5 found that the basic level of information was accessed by 70 to 82% of participants,  
6  
7 but only 9 to 18% accessed the level of information currently recommended in NRES  
8  
9 guidance, and only 3 to 12% accessed all three levels of information. Interestingly,  
10  
11 20% (93/552) participants said they wanted more information even though fewer  
12  
13 than this (3-12%) read all of the information available to them.  
14  
15

16  
17  
18 The study by Antoniou *et al*<sup>38</sup>. is an important first step in determining what  
19  
20 information potential research participants really want to know when they agree to  
21  
22 take part in a study. Further research is required to assess the feasibility and  
23  
24 acceptability of unfolding electronic information sheets.  
25  
26  
27

## 28 29 **Conclusions**

30  
31  
32 There is limited evidence as to what information potential participants want to know  
33  
34 at the time they are deciding whether or not to participate in research. Real time  
35  
36 studies need to be conducted to explore what information potential participants  
37  
38 access when given a choice. This will enable us to determine exactly what  
39  
40 information research participants want to know, tailor PIS towards specific population  
41  
42 sub groups and enable appropriate, high quality information to be provided to meet  
43  
44 individual needs.  
45  
46  
47  
48  
49  
50  
51  
52  
53  
54  
55  
56  
57  
58  
59  
60

### Copyright/licence for publication

The Corresponding Author has the right to grant on behalf of all authors and does grant on behalf of all authors, an exclusive licence on a worldwide basis to the BMJ Publishing Group Ltd and its licensees, to permit this article (if accepted) to be published in BMJ editions and any other BMJPG products and to exploit all subsidiary rights, as set out in the BMJPG licence.

### Competing Interests

All authors have completed the Unified Competing Interest form at [www.icmje.org/coi\\_disclosure.pdf](http://www.icmje.org/coi_disclosure.pdf) (available on request from the corresponding author) and declare that (1) HK, MC, HD, TK, SW have support from the University of Birmingham for the submitted work; (2) HK, MC, HD, TK, SW have no relationships with any companies that might have an interest in the submitted work in the previous 3 years; (3) their spouses, partners, or children have no financial relationships that may be relevant to the submitted work; and (4) HK, MC, HD, TK, SW have no non-financial interests that may be relevant to the submitted work.

### Details of contributors

HK, MC, SW and HD conceived and designed the research. HK and TK collected, validated and extracted data. All authors made substantial contribution to the analysis and interpretation of the data. HK drafted the manuscript and SW, HD, MC and TK revised it.

## Ethical approval

No identifiable personal information has been included in this study.

Ethical approval was not required for this systematic review.

## Funding

The study was funded by the Medical Research Council Midland Hub for Trials Methodology Research (Medical Research Council Grant ID G0800808).

The study sponsor had no role in study design, collection, analysis or interpretation of data, in the writing of the report, or in the decision to submit the article for publication.

HK and TK are PhD students funded by and MC is Education Lead for the Medical Research Council Midland Hub for Trials Research Methodology.

## Data

1  
2  
3 All authors had full access to all of the data in the study and can take responsibility  
4  
5 for the integrity of the data and the accuracy of the data analysis.  
6  
7  
8  
9  
10

### 11 **Data sharing statement**

12  
13  
14  
15  
16 Technical appendix and dataset available from the corresponding author at  
17  
18 hmk592@bham.ac.uk.  
19  
20

21  
22  
23 Referenced Manager (Version 12) was used to analyse data. Stats Direct was used  
24  
25 to calculate pooled proportions with random effects.  
26  
27  
28  
29  
30

### 31 **Supplemental files**

32  
33  
34  
35  
36 Search strategy (appendix 1)  
37  
38  
39  
40  
41  
42  
43  
44  
45  
46  
47  
48  
49  
50  
51  
52  
53  
54  
55  
56  
57  
58  
59  
60



## Reference List

- 1  
2  
3  
4  
5  
6  
7  
8 (1) The World Medical Association. The world medical association declaration of  
9 helsinki Ethical principles for medical research involving human subjects.  
10 2008. 17-5-2009.  
11 Ref Type: Report
- 12  
13 (2) General Medical Council. Seeking patients' consent: The ethical  
14 considerations. 1998.  
15 Ref Type: Report
- 16  
17 (3) Joffe S, Cook EF, Cleary PD, Clark JW, Weeks JC. Quality of informed  
18 consent: a new measure of understanding among research subjects. *Journal*  
19 *of the National Cancer Institute* 2001; 93(2):139-147.
- 20  
21 (4) NHS East of England. NHS Values. 2011. 27-9-2010.  
22 Ref Type: Online Source
- 23  
24 (5) NHS East of England. Principles that guide the NHS. 2011. 27-9-2010.  
25 Ref Type: Online Source
- 26  
27 (6) Manson N. Consent and Informed Consent. In: Ashcroft R, Dawson A,  
28 Draper.H, McMillan JR, editors. Principles of Health Care Ethics. Second ed.  
29 Chichester: John Wiley & Sons Ltd; 2007. 298-303.
- 30  
31 (7) Hewlett S. Consent to clinical research--adequately voluntary or substantially  
32 influenced? *Journal of Medical Ethics* 1996; 22(4):232-237.
- 33  
34 (8) Idanpaan-Heikkila JE. WHO guidelines for good clinical practice (GCP) for  
35 trials on pharmaceutical products: responsibilities of the investigator. *Annals*  
36 *of Medicine* 1994; 26(2):89-94.
- 37  
38 (9) Doyal L, Tobias J. Informed Consent in Medical Research. 1st ed. London:  
39 BMJ Books; 2001.
- 40  
41 (10) National Patient Safety Agency, National Research Ethics Service.  
42 Information Sheets and Consent Forms Guidance For Researchers and  
43 Reviewers. 2009. 16-11-2010.  
44 Ref Type: Pamphlet
- 45  
46 (11) Wager E, Tooley PJ, Emanuel MB, Wood SF. How to do it. Get patients'  
47 consent to enter clinical trials.[see comment]. [Review] [36 refs]. *BMJ* 1995;  
48 311(7007):734-737.
- 49  
50 (12) World Health Organisation. Guidelines for good clinical practice (GCP) for  
51 trials on pharmaceutical products. 850. 1995.  
52 Ref Type: Report
- 53  
54 (13) National Research Ethics Service. Information sheets & consent forms;  
55 Guidance for Researchers & Reviewers. 1-157. 2007. 29-5-2009.
- 56  
57  
58  
59  
60

1  
2  
3 Ref Type: Generic  
4

- 5 (14) National Cancer Institute, U.S.National Institutes of Health. A Guide to  
6 Understanding Informed Consent. [http://www](http://www.cancer.gov/clinicaltrials/conducting/informed-consent-guide/allpages) cancer  
7 gov/clinicaltrials/conducting/informed-consent-guide/allpages [ 2001 [cited  
8 2009 June 5]; Available from:  
9 URL:[http://www.cancer.gov/clinicaltrials/conducting/informed-consent-](http://www.cancer.gov/clinicaltrials/conducting/informed-consent-guide/allpages)  
10 [guide/allpages](http://www.cancer.gov/clinicaltrials/conducting/informed-consent-guide/allpages)  
11
- 12 (15) Davis T, Holcombe R, Berkel H, Pramanik A, Divers S. Informed Consent for  
13 Clinical Trials: a Comparative Study of Standard Versus Simplified Forms.  
14 *Journal of the National Cancer Institute* 1998; 90(9):668-674.  
15
- 16 (16) Fortun P, West J, Chalkley L, Shonde A, Hawkey C. Recall of informed  
17 consent information by healthy volunteers in clinical trials. *Qjm* 2008;  
18 101(8):625-629.  
19
- 20 (17) Grossman S, Piantadosi S, Covahey C. Are informed consent forms that  
21 describe clinical oncology research protocols readable by most patients and  
22 their families? *Journal of Clinical Oncology* 1994; 12(10):2211-2215.  
23
- 24 (18) Priestley K, Campbell C, Valentine C, Denison D, Buller N. Are patient  
25 consent forms for research protocols easy to read? *BMJ* 1992; 305:1263-  
26 1254.  
27
- 28 (19) Lynoe N, Hoeyer K. QUantitative aspects of informed consent: considering  
29 the dose response curve when estimating quantity of information. *Journal of*  
30 *Medical Ethics* 2005; 31:736-738.  
31
- 32 (20) Sharpe N. Clinical Trials and the Real World: Selection Bias and  
33 Generalisability of Trial Results. *Cardiovascular Drugs and Therapy* 2002;  
34 16:75-77.  
35
- 36 (21) Walkup J, Bock E. What do prospective research participants want to know?  
37 What do they assume they know already? *Journal of Empirical Research on*  
38 *Human Research Ethics* 2009; 4(2):59-63.  
39
- 40 (22) Bento SF, Hardy E, Osis MJ. Process for obtaining informed consent:  
41 women's opinions. *Developing World Bioethics* 2008; 8(3):197-206.  
42
- 43 (23) Gray SW, Hlubocky FJ, Ratain MJ, Daugherty CK. Attitudes toward research  
44 participation and investigator conflicts of interest among advanced cancer  
45 patients participating in early phase clinical trials.[see comment]. *Journal of*  
46 *Clinical Oncology* 2007; 25(23):3488-3494.  
47
- 48 (24) Fernandez CV, Santor D, Weijer C, Strahlendorf C, Moghrabi A, Pentz R et al.  
49 The return of research results to participants: pilot questionnaire of  
50 adolescents and parents of children with cancer. *Pediatric Blood & Cancer*  
51 2007; 48(4):441-446.  
52  
53  
54  
55  
56  
57  
58  
59  
60

- 1  
2  
3 (25) Grady C, Horstmann E, Sussman JS, Hull SC. The limits of disclosure: what  
4 research subjects want to know about investigator financial interests. *Journal*  
5 *of Law, Medicine & Ethics* 2000; 34(3):592-599.  
6  
7 (26) Hampson LA, Agrawal M, Joffe S, Gross CP, Verter J, Emanuel EJ. Patients'  
8 views on financial conflicts of interest in cancer research trials.[see comment].  
9 *New England Journal of Medicine* 2006; 355(22):2330-2337.  
10  
11 (27) Weinfurt KP, Friedman JY, Allsbrook JS, Dinan MA, Hall MA, Sugarman J.  
12 Views of potential research participants on financial conflicts of interest:  
13 barriers and opportunities for effective disclosure.[see comment]. *Journal of*  
14 *General Internal Medicine* 2006; 21(9):901-906.  
15  
16 (28) Partridge AH, Wong JS, Knudsen K, Gelman R, Sampson E, Gadd M et al.  
17 Offering participants results of a clinical trial: sharing results of a negative  
18 study. *Lancet* 2005; 365(9463):963-964.  
19  
20 (29) Kim SY, Millard RW, Nisbet P, Cox C, Caine ED. Potential research  
21 participants' views regarding researcher and institutional financial conflicts of  
22 interest. *Journal of Medical Ethics* 2004; 30(1):73-79.  
23  
24 (30) Partridge AH, Burstein HJ, Gelman RS, Marcom PK, Winer EP. Do patients  
25 participating in clinical trials want to know study results? *Journal of the*  
26 *National Cancer Institute* 2003; 95(6):491-492.  
27  
28 (31) Casarett D, Karlawish J, Sankar P, Hirschman KB, Asch DA. Obtaining  
29 informed consent for clinical pain research: patients' concerns and information  
30 needs. *Pain* 2001; 92(1-2):71-79.  
31  
32 (32) Maslin A. A survey of the opinions on 'informed consent' of women currently  
33 involved in clinical trials within a breast unit. *European Journal of Cancer Care*  
34 1994; 3(4):153-162.  
35  
36 (33) Sand K, Loge JH, Berger O, Gronberg BH, Kaasa S. Lung cancer patients'  
37 perceptions of informed consent documents. *Patient Education and*  
38 *Counseling* 2008; 73(2):313-317.  
39  
40 (34) Hutchinson A, Rubinfeld AR. Financial disclosure and clinical research: what  
41 is important to participants? *Medical Journal of Australia* 2008; 189(4):207-  
42 209.  
43  
44 (35) Edgman-Levitan S, Cleary P. What information do consumers want and  
45 need? *Health Affairs* 1996; 15(4):42-56.  
46  
47 (36) Wyke S, Entwistle V, France E, Hunt K, Jepson R, Thompson A et al.  
48 Information for choice: what people need, prefer and use. 08/1710/153. 2011.  
49  
50 Ref Type: Report  
51  
52 (37) Manson NC. Why do patients want information if not to take part in decision  
53 making? *Journal of Medical Ethics* 2010; 36:834-837.  
54  
55  
56  
57  
58  
59  
60

1  
2  
3  
4  
5  
6  
7  
8  
9  
10  
11  
12  
13  
14  
15  
16  
17  
18  
19  
20  
21  
22  
23  
24  
25  
26  
27  
28  
29  
30  
31  
32  
33  
34  
35  
36  
37  
38  
39  
40  
41  
42  
43  
44  
45  
46  
47  
48  
49  
50  
51  
52  
53  
54  
55  
56  
57  
58  
59  
60

(38) Antoniou E, Draper H, Reed K, Burls A, Southwood T, Zeegers M. An empirical study on the preferred size of the participant information sheet in research. *Journal of Medical Ethics* 2011; Online First.

For peer review only

Figure 1 - Results of search strategy and identification of publications included in the review

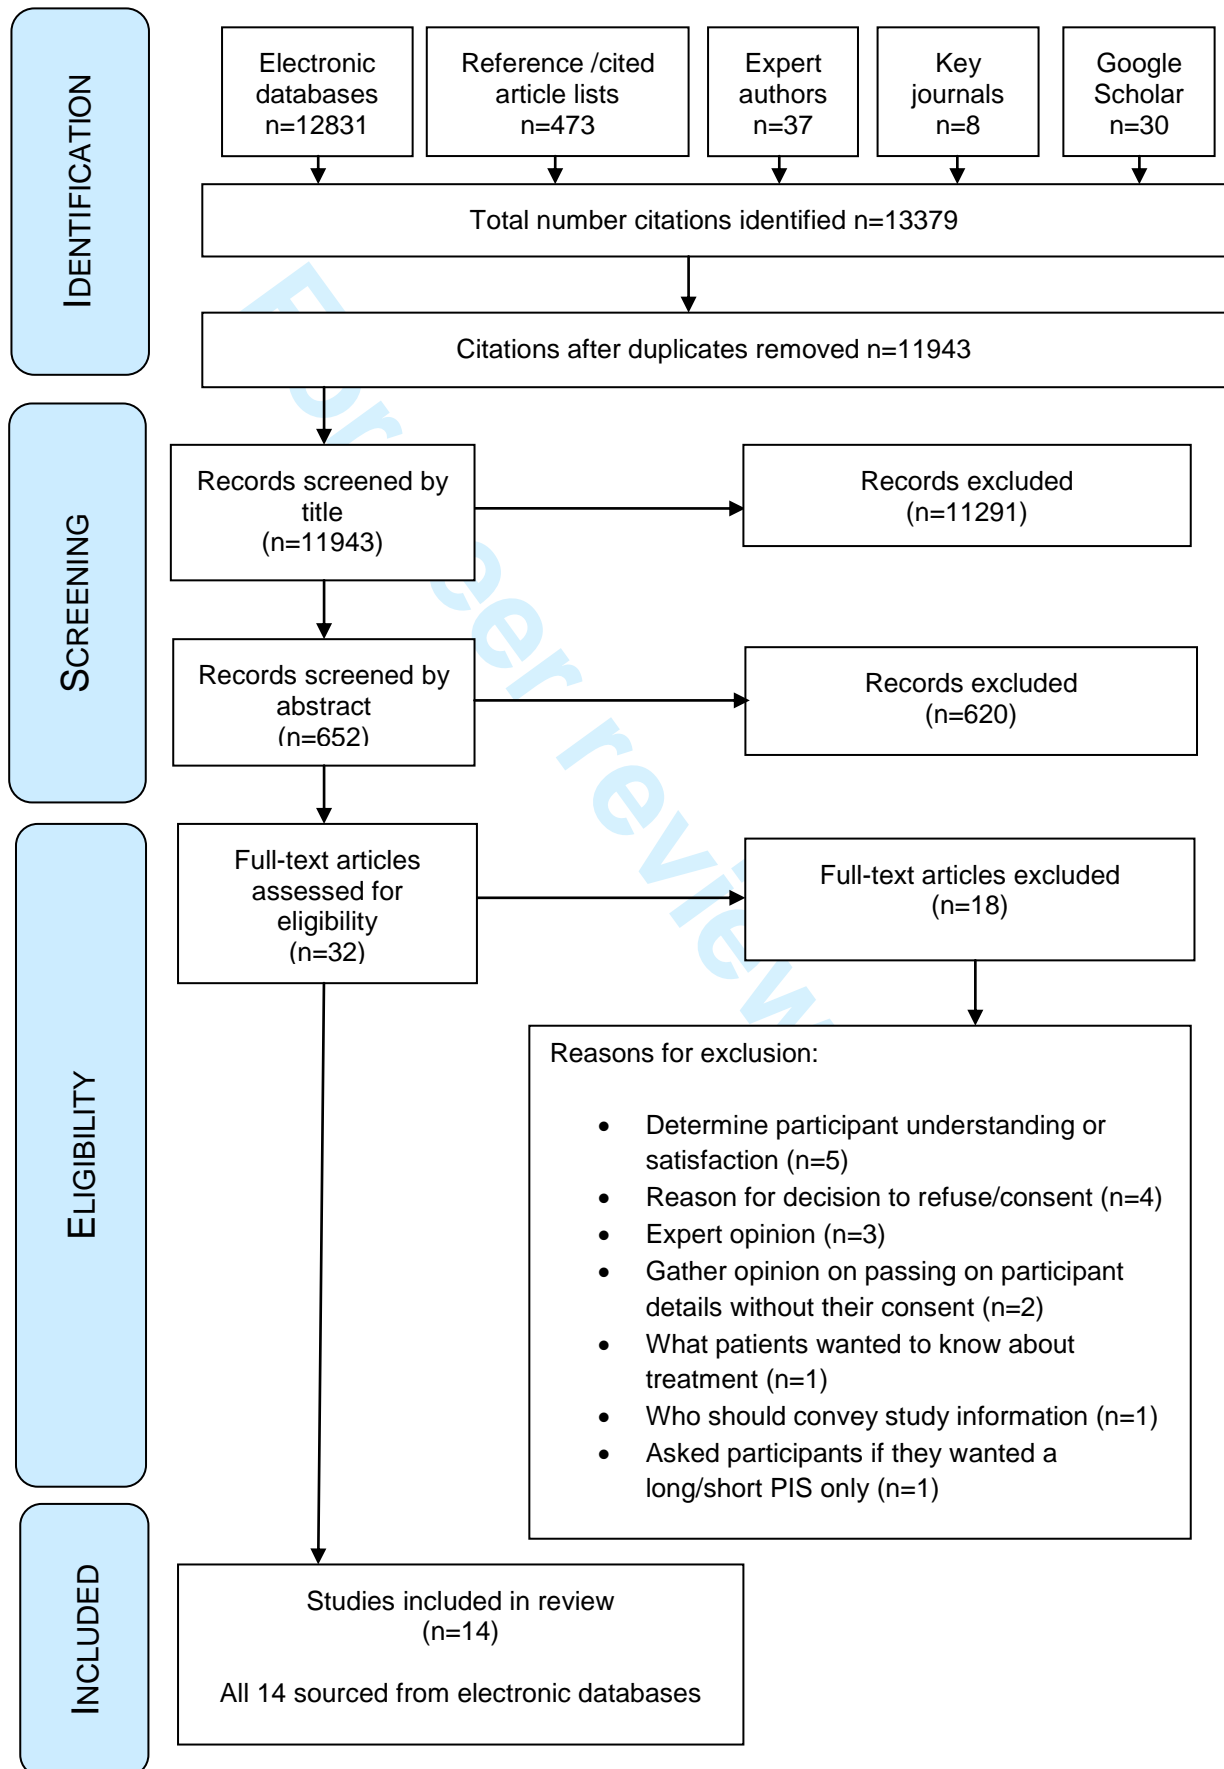

## Appendix 1 – Search strategy

1. "research patient\*".mp. [mp=title, original title, abstract, name of substance word, subject heading word]
2. exp Patients/
3. "participant\*".mp. [mp=title, original title, abstract, name of substance word, subject heading word]
4. exp Research Subjects/
5. 1 or 2 or 3 or 4 or 5 or 6
6. exp Consent Forms/
7. "information leaflet\*".mp. [mp=title, original title, abstract, name of substance word, subject heading word]
8. "information sheet\*".mp. [mp=title, original title, abstract, name of substance word, subject heading word]
9. (consent adj4 form\*).mp. [mp=title, original title, abstract, name of substance word, subject heading word]
10. 8 or 9 or 10 or 11
11. exp Informed Consent/
12. exp Ethics, Research/
13. "medico legal".mp. [mp=title, original title, abstract, name of substance word, subject heading word]
14. "medicolegal".mp. [mp=title, original title, abstract, name of substance word, subject heading word]
15. exp Disclosure/
16. (informed adj4 consent\*).mp. [mp=title, original title, abstract, name of substance word, subject heading word]
17. (research adj4 ethic\*).mp. [mp=title, original title, abstract, name of substance word, subject heading word]
18. "disclos\*".mp. [mp=title, original title, abstract, name of substance word, subject heading word]
19. 13 or 14 or 15 or 16 or 17 or 18 or 19 or 20
20. "want to know".mp. [mp=title, original title, abstract, name of substance word, subject heading word]
21. "want\*".mp. [mp=title, original title, abstract, name of substance word, subject heading word]
22. "information\*".mp. [mp=title, original title, abstract, name of substance word, subject heading word]
23. "require\*".mp. [mp=title, original title, abstract, name of substance word, subject heading word]
24. "desire\*".mp. [mp=title, original title, abstract, name of substance word, subject heading word]
25. "need\*".mp. [mp=title, original title, abstract, name of substance word, subject heading word]
26. "choice\*".mp. [mp=title, original title, abstract, name of substance word, subject heading word]
27. 23 or 24 or 25 or 26 or 27 or 28
28. 7 and 21 and 29
29. 12 or 22 or 30
30. 31 and "Humans" [Subjects]



**What potential research participants want to know about research: a systematic review**

|                                 |                                                                                                                                                                                                                                                                                                                                                                                                                                                                                                               |
|---------------------------------|---------------------------------------------------------------------------------------------------------------------------------------------------------------------------------------------------------------------------------------------------------------------------------------------------------------------------------------------------------------------------------------------------------------------------------------------------------------------------------------------------------------|
| Journal:                        | <i>BMJ Open</i>                                                                                                                                                                                                                                                                                                                                                                                                                                                                                               |
| Manuscript ID:                  | bmjopen-2011-000509.R1                                                                                                                                                                                                                                                                                                                                                                                                                                                                                        |
| Article Type:                   | Research                                                                                                                                                                                                                                                                                                                                                                                                                                                                                                      |
| Date Submitted by the Author:   | 29-Mar-2012                                                                                                                                                                                                                                                                                                                                                                                                                                                                                                   |
| Complete List of Authors:       | Kirkby, Helen; The University of Birmingham, MRC Midlands Hub for Trials Methodology Research (HTMR)<br>Calvert, Melanie; The University of Birmingham, MRC Midlands Hub for Trials Methodology Research (HTMR)<br>Draper, Heather; The University of Birmingham, Centre for Biomedical Ethics<br>Keeley, Thomas; The University of Birmingham, MRC Midlands Hub for Trials Methodology Research (HTMR)<br>Wilson, Sue; The University of Birmingham, MRC Midlands Hub for Trials Methodology Research (HTMR) |
| <b>Primary Subject Heading</b>: | Ethics                                                                                                                                                                                                                                                                                                                                                                                                                                                                                                        |
| Secondary Subject Heading:      | Communication, Health services research, Patient-centred medicine, Qualitative research, Research methods                                                                                                                                                                                                                                                                                                                                                                                                     |
| Keywords:                       | MEDICAL ETHICS, ETHICS (see Medical Ethics), GENERAL MEDICINE (see Internal Medicine)                                                                                                                                                                                                                                                                                                                                                                                                                         |
|                                 |                                                                                                                                                                                                                                                                                                                                                                                                                                                                                                               |

SCHOLARONE™  
Manuscripts

only

1  
2  
3  
4  
5  
6 what potential research participants want to know about  
7 research: a systematic review

8 **Helen Kirkby, Melanie Calvert, Heather Draper, Thomas Keeley,**  
9 **Sue Wilson**

10 MRC Midlands Hub for Trials Methodology Research (HTMR),  
11 University of Birmingham, Edgbaston, B15 2TT Helen Kirkby PhD  
12 student

13 MRC Midlands Hub for Trials Methodology Research (HTMR),  
14 University of Birmingham, Edgbaston, B15 2TT Melanie Calvert Senior  
15 Lecturer

16 Medicine, Ethics, Society and History, Primary Care Clinical Sciences,  
17 School of Health and Population Science, University of Birmingham,  
18 Edgbaston, B15 2TT Heather Draper Professor of Biomedical Ethics

19 MRC Midlands Hub for Trials Methodology Research (HTMR),  
20 University of Birmingham, Edgbaston, B15 2TT Thomas Keeley PhD  
21 student

22 MRC Midlands Hub for Trials Methodology Research (HTMR), ,  
23 University of Birmingham, Edgbaston, B15 2TT Sue Wilson Professor of  
24 Clinical Epidemiology  
25  
26  
27

28 **Correspondence to: [hmk592@bham.ac.uk](mailto:hmk592@bham.ac.uk)**  
29  
30  
31  
32  
33  
34  
35  
36  
37  
38  
39  
40  
41  
42  
43  
44  
45  
46  
47  
48  
49  
50  
51  
52  
53  
54  
55  
56  
57  
58  
59  
60



## **ABSTRACT**

### **Objective**

To establish the empirical evidence base for the information that participants want to know about medical research and to assess how this relates to current guidance from the National Research Ethics Service (NRES).

### **Data Sources**

Medline, Web of Science, Applied Social Sciences Index and Abstracts (ASSIA), Sociological abstracts, Health Management Information Consortium (HMIC), Cochrane library, thesis index's, grey literature databases, reference and cited article lists, key journals, Google Scholar and correspondence with expert authors.

### **Study selection**

Original research studies published between 1950 and October 2010 that asked potential participants to indicate how much or what types of information they wanted to be told about a research study or asked them to rate the importance of a specific piece of information were included.

### **Study appraisal and synthesis methods**

Studies were appraised based on the generalisability of results to the UK potential research participant population. A meta-data analysis using basic thematic analysis was used to split results from papers into themes based on the sections of information that NRES recommends should be included in a participant information sheet.

## Results

14 studies were included. Of the 20 pieces of information that NRES recommend should be included in patient information sheets for research pooled proportions could be calculated for seven themes. Results showed that potential participants wanted to be offered information about result dissemination (91% [95% CI 85%; 95%]), investigator conflicts of interest (48% [95% CI 27%;69%]), the purpose of the study (76% [95% CI 27%;100%]), voluntariness (39% [95% CI 2%; 100%]), how long the research would last (61% [95% CI 16%;97%]), potential benefits (57% [95% CI 7%; 98%]) and confidentiality (44% [95% CI 10%; 82%]). The level of detail participants wanted to know was not explored comprehensively in the studies. There was no empirical evidence to support the level of information provision required by participants on the remaining 7 items.

## Conclusions

There is limited empirical evidence on what potential participants want to know about research. The existing empirical evidence suggests that individuals may have very different needs and a more tailored evidence based approach may be necessary.

## Article Summary

### Article Focus:

- What information do potential participants want to know when they are deciding whether to take part in research?
- What is the established empirical evidence base?
- How does the current empirical evidence base relate to current guidance from the National Research Ethics Service (NRES)?

### Key messages:

- There is little empirical evidence of what information potential participants want to know about research when they are making the decision to take part.
- The limited empirical evidence available suggests that potential participants may have very different information needs.
- Further research is required to determine what potential participants really want to know about research and how this can be delivered in a way that takes into account their different informational needs.

### Study Strengths:

- An extensive search strategy ensured the review was systematic in capturing all available empirical evidence.

### Study Limitations:

- Papers included in the review differed in their methodologies and presentation of results, making comparisons between papers extremely difficult.

## Introduction

Medical research is central to the advancement of treatments, services and technology.[1-3] Potential participants have the right to choose whether they participate in medical research [4, 5] and individuals must give their consent prior to participating in research. As part of this ongoing process, potential participants must be provided with sufficient information to make a voluntary and informed decision.[2, 6-11] In research settings, study information is usually conveyed to potential participants in the form of a written participant information sheet (PIS), which is later reinforced by a verbal consent interview with a member of the research team.[12]

In the UK, the National Research Ethics Service (NRES) provides extensive guidance on how a PIS should be written and presented. The guidance suggests that a PIS should be split into two parts where part one provides a brief and clear explanation of the essential elements of the specific study and allows participants to make an initial choice of whether the study is of interest. Part two should then contain additional information on matters such as confidentiality, indemnity and publication intentions.

There is some concern that PIS have become increasingly lengthy over recent years.[10; 13, 14] Complex studies, for example where the potential participant might, e.g. on the basis of test results be invited to participate in a further phase of the study, often use detailed and lengthy PISs. This can lead to poor understanding by participants [15-17] and a corresponding concern that consent criteria are not always met. NRES guidance is not explicit in the level of detail to be included in a

1  
2  
3 PIS and there is disagreement amongst experts about how much information to  
4 include.[18] If PISs become so complex that only the most confident and educated  
5 participants are able to digest all the information, this may result in selection bias  
6 meaning that research is less generalisable.[19] Further, there is a risk that  
7 healthcare researchers are becoming increasingly paternalistic in their information  
8 provision without recognising individual participant needs. In order to help address  
9 the problem of how much information to include in PIS, we conducted a systematic  
10 review that aimed to establish the empirical evidence base for the information that  
11 potential participants want to know when they are deciding about participation.  
12  
13  
14  
15  
16  
17  
18  
19  
20  
21  
22  
23  
24  
25  
26  
27  
28  
29  
30  
31  
32  
33  
34  
35  
36  
37  
38  
39  
40  
41  
42  
43  
44  
45  
46  
47  
48  
49  
50  
51  
52  
53  
54  
55  
56  
57  
58  
59  
60

## Methods

### Selection Criteria and Literature Search

This systematic review included all studies that asked participants to indicate how much or what type of information they wanted to be told about a research study, or asked them to rate the importance of a specific piece of information. We included studies published between 1950 and 27<sup>th</sup> October 2010 with no limit to language or participant group. We only included studies of participant opinion and excluded studies of health care professional or other expert opinion.

We combined Mesh terms Patient, Research Subjects, Consent forms, Informed Consent and Research ethics with terms relating to information provision (Appendix 1). We conducted searches in Medline, Web of Science, ASSIA, Sociological abstracts, HMIC and the Cochrane Library electronic databases. We also searched thesis index's, grey Literature databases, reference and cited article lists, key journals and Google Scholar and we asked expert authors to identify relevant studies.

We did not conduct a formal quality assessment of included literature because there were both quantitative and qualitative studies, widely varied study methods and different types of results that were often not comparable between papers. Instead, we conducted a critical appraisal of each paper using five quality indicators (response rate, sample size, demographics, participant characteristics and strengths and limitations of study methods). The strengths and limitations of each study are presented in Table 1.

### Data Extraction and Synthesis

One researcher (HK) extracted data from papers using a pre defined data extraction sheet and a second researcher (TK) checked it for accuracy with disagreements resolved by discussion between these two authors

For peer review only

1  
2  
3 Table 1). A meta data analysis using basic thematic analysis was used to analyse  
4  
5 the data from the 14 papers. Themes were based on the sections of information that  
6  
7 NRES recommends should be included in a PIS (Table 2).[10] Each paper was  
8  
9 assessed to identify any further themes relating to what information research  
10  
11 participants may want to know. A meta data analysis coded individual results based  
12  
13 on their relevance to each theme and then themes were collated to report overall  
14  
15 results. For themes where more than one quantitative study reported a proportion of  
16  
17 participants wanting to know the information, pooled proportions with random effects  
18  
19 were calculated using StatsDirect statistical software (StatsDirect Ltd, UK).  
20  
21  
22  
23  
24  
25  
26  
27  
28  
29  
30  
31  
32  
33  
34  
35  
36  
37  
38  
39  
40  
41  
42  
43  
44  
45  
46  
47  
48  
49  
50  
51  
52  
53  
54  
55  
56  
57  
58  
59  
60



## Results

The search yielded 11943 unique references. We discarded 11291 after reviewing the title, 620 after reviewing the abstract and a further 18 after reviewing the full paper (Figure 1). HK conducted the citation screening and TK independently validated approximately 10% of the references identified from electronic databases (96.0% kappa agreement rate). All 14 included studies were identified from searches of Medline and ASSIA. Expert authors identified 37 unique references; 13 were duplicates from the electronic searches and 24 did not meet the inclusion criteria.

TABLE 1 - SUMMARY OF STUDIES INCLUDED IN THE SYSTEMATIC REVIEW

1  
2  
3  
4  
5  
6  
7  
8  
9  
10  
11  
12  
13  
14  
15  
16  
17  
18  
19  
20  
21  
22  
23  
24  
25  
26  
27  
28  
29  
30  
31  
32  
33  
34  
35  
36  
37  
38  
39  
40  
41  
42  
43  
44  
45  
46  
47  
48  
49

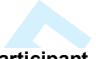

| Lead author / Country / Year | Inclusion / exclusion criteria                                                                                                                                                  | Participant illness | Participant demographics                                                                                                                                                                                                                       | Total number of participants (response rate)     | Study design                                  | Sampling strategy | Analysis                       | Key Themes explored                                                                                 | Study strengths                                                                                                                                                                                                                                                                                      | Study limitations                                                                                                                                                       |
|------------------------------|---------------------------------------------------------------------------------------------------------------------------------------------------------------------------------|---------------------|------------------------------------------------------------------------------------------------------------------------------------------------------------------------------------------------------------------------------------------------|--------------------------------------------------|-----------------------------------------------|-------------------|--------------------------------|-----------------------------------------------------------------------------------------------------|------------------------------------------------------------------------------------------------------------------------------------------------------------------------------------------------------------------------------------------------------------------------------------------------------|-------------------------------------------------------------------------------------------------------------------------------------------------------------------------|
| Walkup [31] USA 2009         | None provided                                                                                                                                                                   | None                | <u>Gender:</u><br>Not reported<br><br><u>Age:</u><br>Not reported<br><br><u>Education / deprivation:</u><br>Not reported<br><br><u>Ethnicity:</u><br>Not reported                                                                              | 57 (not provided)                                | Exploration of conversation and questionnaire | Convenience       | Descriptive summary statistics | Study purpose, voluntariness, study method, risks, benefits, confidentiality, review board approval | Participants approached in a public setting and invited to complete a questionnaire and researcher recorded study information spontaneously requested<br><br>Did not specify a disease group                                                                                                         | No inclusion/exclusion criteria<br><br>Participant demographics not reported                                                                                            |
| Bento [21] Brazil 2007       | Female participants aged 18-49 who had taken part in a clinical trial of women's health in the previous 12 months and lived in Metropolitan area of Campinas, Sao Paulo, Brazil | Women's health      | <u>Gender:</u><br>Only women<br><br><u>Age:</u><br>18-49<br><br><u>Education / deprivation:</u><br>4 focus groups 8 <sup>th</sup> grade or less, 4 focus groups above 8 <sup>th</sup> grade education<br><br><u>Ethnicity:</u><br>Not reported | 51 participants<br>8 focus groups (not provided) | Focus groups                                  | Convenience       | Framework analysis             | Study methods, risks and benefits                                                                   | Participants of different ages and educational level likely to have different needs and opinions regarding topic<br><br>Focus groups homogenous for age and educational level; suitable to ensure they were comfortable expressing opinions<br><br>Recruitment continued until data saturation point | Demographics not representative of the general population as the study only included women and was limited to participants from a trial of a contraceptive intervention |
| Hutchinson [7] Australia     | Participants of clinical trials of COPD, asthma,                                                                                                                                | Chronic illness     | <u>Gender:</u><br>52% male                                                                                                                                                                                                                     | 259/324 (80%)                                    | Questionnaire                                 | Convenience       | Descriptive summary statistics | Conflicts of Interest (Col)/organisat                                                               |                                                                                                                                                                                                                                                                                                      | Demographics not representative of the general                                                                                                                          |

1  
2  
3  
4  
5  
6  
7  
8  
9  
10  
11  
12  
13  
14  
15  
16  
17  
18  
19  
20  
21  
22  
23  
24  
25  
26  
27  
28  
29  
30  
31  
32  
33  
34  
35  
36  
37  
38  
39  
40  
41  
42  
43  
44  
45  
46  
47  
48  
49

|                            |                                                                                                                                                                                   |                        |                                                                                                                                                                                                                                                                                                                                                                                                         |                                                      |               |                                                       |                                                                                        |                                                                      |                                                                                                                                                                                   |                                                                                                                                                                      |
|----------------------------|-----------------------------------------------------------------------------------------------------------------------------------------------------------------------------------|------------------------|---------------------------------------------------------------------------------------------------------------------------------------------------------------------------------------------------------------------------------------------------------------------------------------------------------------------------------------------------------------------------------------------------------|------------------------------------------------------|---------------|-------------------------------------------------------|----------------------------------------------------------------------------------------|----------------------------------------------------------------------|-----------------------------------------------------------------------------------------------------------------------------------------------------------------------------------|----------------------------------------------------------------------------------------------------------------------------------------------------------------------|
| 2008                       | diabetes, osteoporosis, rheumatoid arthritis and the influenza vaccine. Excluded if clinical trial for acute, life threatening or debilitating conditions with inadequate therapy |                        | <u>Age:</u><br>Median age 70 [range not reported]                                                                                                                                                                                                                                                                                                                                                       |                                                      |               |                                                       | and multivariate logistic regression                                                   | ion and funding of the research                                      | population as median age of 70                                                                                                                                                    |                                                                                                                                                                      |
| Gray [23] USA 2007         | Participants enrolled onto a phase I research trial, spoke English, and were medically and mentally capable of participating                                                      | Phase I research trial | <u>Gender:</u><br>52% male<br><u>Age:</u><br>Median age 61 [range 26-82]<br><u>Education / deprivation:</u><br>Range of backgrounds<br><u>Ethnicity:</u><br>Not reported                                                                                                                                                                                                                                | 102/119 (86%)                                        | Questionnaire | Consecutive participant s enrolling onto parent trial | Descriptive summary statistics, Chi squared tests and Multivariate logistic regression | Conflicts of Interest (Col)/organisation and funding of the research | Same interviewer conducted all interviews                                                                                                                                         | Demographics not representative of the general population as the median age was 61 and was limited to cancer patients participating in an early phase clinical trial |
| Fernandez [32] Canada 2007 | English speaking adolescent with cancer or parents of children with cancer. Excluded acutely unwell or recently relapsed                                                          | Cancer                 | <u>Gender:</u><br>Adolescents not reported<br>Parents mostly female [23/30; 77%]<br><u>Age:</u><br>Adolescents median age 16 [range 13-20]<br>Parents median age 40.9 [range 28-53]<br><u>Education / deprivation:</u><br>Adolescents predominantly in education [no figures reported]<br>Parents 50% with post secondary education<br><u>Ethnicity:</u><br>Adolescents 80% White<br>Parents 100% White | 40/43 - 10 adolescent, 30 parent participants, (93%) | Questionnaire | Random                                                | Descriptive summary statistics and Chi squared tests                                   | Return of study results                                              | Demographics not representative of general population as participants were well educated, mostly Caucasian and limited to adolescents with cancer/parents of children with cancer |                                                                                                                                                                      |

|    |               |                                                                                                                                                                                                                                         |         |                                                                         |                                |                                         |              |                                                                                                                |                                                                      |                                                                                                                                                |                                                                                                                                                                                                                                                                               |
|----|---------------|-----------------------------------------------------------------------------------------------------------------------------------------------------------------------------------------------------------------------------------------|---------|-------------------------------------------------------------------------|--------------------------------|-----------------------------------------|--------------|----------------------------------------------------------------------------------------------------------------|----------------------------------------------------------------------|------------------------------------------------------------------------------------------------------------------------------------------------|-------------------------------------------------------------------------------------------------------------------------------------------------------------------------------------------------------------------------------------------------------------------------------|
| 1  |               |                                                                                                                                                                                                                                         |         |                                                                         |                                |                                         |              |                                                                                                                |                                                                      |                                                                                                                                                |                                                                                                                                                                                                                                                                               |
| 2  |               |                                                                                                                                                                                                                                         |         |                                                                         |                                |                                         |              |                                                                                                                |                                                                      |                                                                                                                                                |                                                                                                                                                                                                                                                                               |
| 3  |               |                                                                                                                                                                                                                                         |         |                                                                         |                                |                                         |              |                                                                                                                |                                                                      |                                                                                                                                                |                                                                                                                                                                                                                                                                               |
| 4  |               |                                                                                                                                                                                                                                         |         |                                                                         |                                |                                         |              |                                                                                                                |                                                                      |                                                                                                                                                |                                                                                                                                                                                                                                                                               |
| 5  | Grady [21]    | Participants of HIV, Hepatitis, Arthritis and Surgical Oncology Trials who were >18 years and English speaking                                                                                                                          | Various | <u>Gender:</u><br>61% male                                              | 33 (not provided)              | Face to face semi structured interviews | Convenience  | Transcripts coded and themes and major concepts identified                                                     | Conflicts of Interest (Col)/organisation and funding of the research | Open questions used during interviews<br><br>Data collection continued to saturation point<br><br>Two authors independently conducted analysis | Used hypothetical scenario<br><br>Demographics not representative of general population as participants were more often male and limited to adults participating in HIV, hepatitis, arthritis or surgical oncology trials                                                     |
| 6  | USA 2006      |                                                                                                                                                                                                                                         |         | <u>Age:</u><br>Not reported                                             |                                |                                         |              |                                                                                                                |                                                                      |                                                                                                                                                |                                                                                                                                                                                                                                                                               |
| 7  |               |                                                                                                                                                                                                                                         |         | <u>Education / deprivation:</u><br>Range of backgrounds                 |                                |                                         |              |                                                                                                                |                                                                      |                                                                                                                                                |                                                                                                                                                                                                                                                                               |
| 8  |               |                                                                                                                                                                                                                                         |         | <u>Ethnicity:</u><br>70% White                                          |                                |                                         |              |                                                                                                                |                                                                      |                                                                                                                                                |                                                                                                                                                                                                                                                                               |
| 9  |               |                                                                                                                                                                                                                                         |         |                                                                         |                                |                                         |              |                                                                                                                |                                                                      |                                                                                                                                                |                                                                                                                                                                                                                                                                               |
| 10 |               |                                                                                                                                                                                                                                         |         |                                                                         |                                |                                         |              |                                                                                                                |                                                                      |                                                                                                                                                |                                                                                                                                                                                                                                                                               |
| 11 |               |                                                                                                                                                                                                                                         |         |                                                                         |                                |                                         |              |                                                                                                                |                                                                      |                                                                                                                                                |                                                                                                                                                                                                                                                                               |
| 12 |               |                                                                                                                                                                                                                                         |         |                                                                         |                                |                                         |              |                                                                                                                |                                                                      |                                                                                                                                                |                                                                                                                                                                                                                                                                               |
| 13 |               |                                                                                                                                                                                                                                         |         |                                                                         |                                |                                         |              |                                                                                                                |                                                                      |                                                                                                                                                |                                                                                                                                                                                                                                                                               |
| 14 |               |                                                                                                                                                                                                                                         |         |                                                                         |                                |                                         |              |                                                                                                                |                                                                      |                                                                                                                                                |                                                                                                                                                                                                                                                                               |
| 15 |               |                                                                                                                                                                                                                                         |         |                                                                         |                                |                                         |              |                                                                                                                |                                                                      |                                                                                                                                                |                                                                                                                                                                                                                                                                               |
| 16 | Hampson [27]  | Participants with cancer and enrolled in a clinical trial who were English speaking and >18 years                                                                                                                                       | Cancer  | <u>Gender:</u><br>56% male                                              | 252/272 (93%)                  | Structured face to face interviews      | Not provided | Descriptive summary statistics and Fishers exact test / Kruskal-Wallis test                                    | Conflicts of Interest (Col)/organisation and funding of the research | Validated interview questions                                                                                                                  | Demographics not representative of general population as the study population were well educated, financially secure and limited to adult participants of a clinical trial                                                                                                    |
| 17 | USA 2006      |                                                                                                                                                                                                                                         |         | <u>Age:</u><br>24% < 50, 32% 50-59, 26% 60-69, 16% >70                  |                                |                                         |              |                                                                                                                |                                                                      |                                                                                                                                                |                                                                                                                                                                                                                                                                               |
| 18 |               |                                                                                                                                                                                                                                         |         | <u>Education / deprivation:</u><br>Well educated and financially secure |                                |                                         |              |                                                                                                                |                                                                      |                                                                                                                                                |                                                                                                                                                                                                                                                                               |
| 19 |               |                                                                                                                                                                                                                                         |         | <u>Ethnicity:</u><br>92% White                                          |                                |                                         |              |                                                                                                                |                                                                      |                                                                                                                                                |                                                                                                                                                                                                                                                                               |
| 20 |               |                                                                                                                                                                                                                                         |         |                                                                         |                                |                                         |              |                                                                                                                |                                                                      |                                                                                                                                                |                                                                                                                                                                                                                                                                               |
| 21 |               |                                                                                                                                                                                                                                         |         |                                                                         |                                |                                         |              |                                                                                                                |                                                                      |                                                                                                                                                |                                                                                                                                                                                                                                                                               |
| 22 |               |                                                                                                                                                                                                                                         |         |                                                                         |                                |                                         |              |                                                                                                                |                                                                      |                                                                                                                                                |                                                                                                                                                                                                                                                                               |
| 23 |               |                                                                                                                                                                                                                                         |         |                                                                         |                                |                                         |              |                                                                                                                |                                                                      |                                                                                                                                                |                                                                                                                                                                                                                                                                               |
| 24 |               |                                                                                                                                                                                                                                         |         |                                                                         |                                |                                         |              |                                                                                                                |                                                                      |                                                                                                                                                |                                                                                                                                                                                                                                                                               |
| 25 | Weinfurt [29] | Healthy adults or those with a mild chronic illness. Excluded if they had participated in another focus group within the previous 6 months or were working or had worked for an organisation involved in the conduct of clinical trials | Healthy | <u>Gender:</u><br>42% male                                              | 16 focus groups (not provided) | Focus groups                            | Convenience  | Initial content codes based on transcripts developed that were summarised and reviewed to identify main themes | Conflicts of Interest (COI)/organisation and funding of the research | Participants not limited to disease group                                                                                                      | Only one moderator conducted focus groups<br><br>Non-verbal communication not recorded<br><br>Demographics not representative of general population as the study population were well educated, financially secure and the majority had previously shown interest in research |
| 26 | USA 2006      |                                                                                                                                                                                                                                         |         | <u>Age:</u><br>12% 18-29, 51% 30-49, 37% >50                            |                                |                                         |              |                                                                                                                |                                                                      |                                                                                                                                                |                                                                                                                                                                                                                                                                               |
| 27 |               |                                                                                                                                                                                                                                         |         | <u>Education / deprivation:</u><br>Well educated and financially secure |                                |                                         |              |                                                                                                                |                                                                      |                                                                                                                                                |                                                                                                                                                                                                                                                                               |
| 28 |               |                                                                                                                                                                                                                                         |         | <u>Ethnicity:</u><br>56% White                                          |                                |                                         |              |                                                                                                                |                                                                      |                                                                                                                                                |                                                                                                                                                                                                                                                                               |
| 29 |               |                                                                                                                                                                                                                                         |         |                                                                         |                                |                                         |              |                                                                                                                |                                                                      |                                                                                                                                                |                                                                                                                                                                                                                                                                               |
| 30 |               |                                                                                                                                                                                                                                         |         |                                                                         |                                |                                         |              |                                                                                                                |                                                                      |                                                                                                                                                |                                                                                                                                                                                                                                                                               |
| 31 |               |                                                                                                                                                                                                                                         |         |                                                                         |                                |                                         |              |                                                                                                                |                                                                      |                                                                                                                                                |                                                                                                                                                                                                                                                                               |
| 32 |               |                                                                                                                                                                                                                                         |         |                                                                         |                                |                                         |              |                                                                                                                |                                                                      |                                                                                                                                                |                                                                                                                                                                                                                                                                               |
| 33 |               |                                                                                                                                                                                                                                         |         |                                                                         |                                |                                         |              |                                                                                                                |                                                                      |                                                                                                                                                |                                                                                                                                                                                                                                                                               |
| 34 |               |                                                                                                                                                                                                                                         |         |                                                                         |                                |                                         |              |                                                                                                                |                                                                      |                                                                                                                                                |                                                                                                                                                                                                                                                                               |
| 35 |               |                                                                                                                                                                                                                                         |         |                                                                         |                                |                                         |              |                                                                                                                |                                                                      |                                                                                                                                                |                                                                                                                                                                                                                                                                               |
| 36 |               |                                                                                                                                                                                                                                         |         |                                                                         |                                |                                         |              |                                                                                                                |                                                                      |                                                                                                                                                |                                                                                                                                                                                                                                                                               |
| 37 |               |                                                                                                                                                                                                                                         |         |                                                                         |                                |                                         |              |                                                                                                                |                                                                      |                                                                                                                                                |                                                                                                                                                                                                                                                                               |
| 38 |               |                                                                                                                                                                                                                                         |         |                                                                         |                                |                                         |              |                                                                                                                |                                                                      |                                                                                                                                                |                                                                                                                                                                                                                                                                               |
| 39 |               |                                                                                                                                                                                                                                         |         |                                                                         |                                |                                         |              |                                                                                                                |                                                                      |                                                                                                                                                |                                                                                                                                                                                                                                                                               |

1  
2  
3  
4  
5  
6  
7  
8  
9  
10  
11  
12  
13  
14  
15  
16  
17  
18  
19  
20  
21  
22  
23  
24  
25  
26  
27  
28  
29  
30  
31  
32  
33  
34  
35  
36  
37  
38  
39  
40  
41  
42  
43  
44  
45  
46  
47  
48  
49

|                         |                                                                                                                                                                     |               |                                                                                                                                                                                   |                  |                      |             |                                                                           |                                                                      |                                                                                                                                                     |                                                                                                                                                                                                                                                                            |
|-------------------------|---------------------------------------------------------------------------------------------------------------------------------------------------------------------|---------------|-----------------------------------------------------------------------------------------------------------------------------------------------------------------------------------|------------------|----------------------|-------------|---------------------------------------------------------------------------|----------------------------------------------------------------------|-----------------------------------------------------------------------------------------------------------------------------------------------------|----------------------------------------------------------------------------------------------------------------------------------------------------------------------------------------------------------------------------------------------------------------------------|
| Partridge [24] USA 2005 | All participants of the parent trial (chemotherapy trial)                                                                                                           | Cancer        | <u>Gender:</u><br>Only women<br><u>Age:</u><br>Mean age 55 [range not reported]<br><u>Education / deprivation:</u><br>Range of backgrounds<br><u>Ethnicity:</u><br>96% White      | 94/135 (69.6%)   | Questionnaire        | Convenience | Simple descriptive statistics                                             | Return of study results                                              |                                                                                                                                                     | Participant selection biased towards participants that wanted to know study results<br><br>Demographics not representative of general population as the study population were mostly white, only included females and was limited to participants of a breast cancer trial |
| Kim [30] USA 2004       | Potential research participants >18 years, diagnosed with heart disease, breast cancer or depression, and listed on the Harris Interactive Chronic Illness Database | Various       | <u>Gender:</u><br>50% male<br><u>Age:</u><br>4% 18-29, 16% 30-44, 61% 45-64, 19% 65+<br><u>Education / deprivation:</u><br>Range of backgrounds<br><u>Ethnicity:</u><br>92% White | 5478/20205 (27%) | Online questionnaire | Random      | 2-way ANOVA modified for ordinal data and multinomial logistic regression | Conflicts of Interest (Col)/organisation and funding of the research | Validated questionnaire<br>Participants chosen at random but from the subset of those registered on the Harris Interactive Chronic Illness Database | Demographics not representative of general population as it was limited to Internet users                                                                                                                                                                                  |
| Partridge [25] USA 2003 | Any participant enrolled into the parent study (chemotherapy trial)                                                                                                 | Breast cancer | <u>Gender:</u><br>Not reported<br><u>Age:</u><br>Median age 54 [range 29-82]<br><u>Education / deprivation:</u><br>Range of backgrounds<br><u>Ethnicity:</u><br>84% White         | 51/55 (93%)      | Questionnaire        | Convenience | Simple descriptive statistics                                             | Return of study results                                              | Multicentre                                                                                                                                         | Un-validated questionnaire<br><br>Demographics not representative of general population as the study was limited to participants of a breast cancer trial. Gender was not presented but                                                                                    |

1  
2  
3  
4  
5  
6  
7  
8  
9  
10  
11  
12  
13  
14  
15  
16  
17  
18  
19  
20  
21  
22  
23  
24  
25  
26  
27  
28  
29  
30  
31  
32  
33  
34  
35  
36  
37  
38  
39  
40  
41  
42  
43  
44  
45  
46  
47  
48  
49

expect most were female given disease area

|                        |                                                                                                                                                                                               |              |                                                                                                                                                                          |               |                                      |             |                                                                                                      |                                                                                          |                                                                                                    |                                                                                                                                                                                                                                                                                           |
|------------------------|-----------------------------------------------------------------------------------------------------------------------------------------------------------------------------------------------|--------------|--------------------------------------------------------------------------------------------------------------------------------------------------------------------------|---------------|--------------------------------------|-------------|------------------------------------------------------------------------------------------------------|------------------------------------------------------------------------------------------|----------------------------------------------------------------------------------------------------|-------------------------------------------------------------------------------------------------------------------------------------------------------------------------------------------------------------------------------------------------------------------------------------------|
| Casarett [20] USA 2001 | Participants with a current telephone number, enrolled at a pain clinic, who had chronic non-malignant pain, were taking scheduled opioids and had experienced the pain for at least 6 months | Chronic pain | <u>Gender:</u><br>40% male<br><u>Age:</u><br>Mean age 47 [range 30-86]<br><u>Education / deprivation:</u><br>Range of backgrounds<br><u>Ethnicity:</u><br>85% White      | 40/86 (46.5%) | Semi structured telephone interviews | Convenience | Descriptive summary statistics and Bivariate analysis with non-parametric tests                      | Voluntariness, study methods, expenses, risks and the drug/device/procedure being tested | Validated interview topic guide<br><br>Questions spontaneously asked by participants were recorded | Demographics not representative of general population as participants were more often male and limited to chronic pain patients                                                                                                                                                           |
| Maslin [33] UK 1994    | Attending a breast unit and were patients with a breast cancer diagnosis or asymptomatic women with a family history of breast cancer                                                         | Cancer       | <u>Gender:</u><br>Only women<br><u>Age:</u><br>Median 47 [range 24-81]<br><u>Education / deprivation:</u><br>Not reported<br><u>Ethnicity:</u><br>Not reported           | 213/300 (71%) | Postal questionnaire                 | Random      | Simple descriptive statistics                                                                        | Study purpose, voluntariness, study methods, risks, benefits and confidentiality         | Participants chosen at random but from a subset of those attending a breast unit                   | Demographics not representative of general population as the study only included females and was limited those with breast cancer                                                                                                                                                         |
| Sand [22] Norway 2008  | Participants eligible for the parent study (all lung cancer patients)                                                                                                                         | Cancer       | <u>Gender:</u><br>57% male<br><u>Age:</u><br>Median age 69 [range 44-84]<br><u>Education / deprivation:</u><br>Range of backgrounds<br><u>Ethnicity:</u><br>Not reported | 21/33 (64%)   | Semi structured interviews           | Convenience | Identification and categorisation of themes and analysis based on deductive and inductive categories | Voluntariness, study methods and treatment alternatives                                  |                                                                                                    | No inclusion/exclusion criteria stated but 11 potential participants were not invited<br><br>Technical problems with 3 recordings<br><br>Demographics not representative of the general population as participants were more often male, had a median age of 69 years and were limited to |

lung cancer  
patients

---

For peer review only

1  
2  
3  
4  
5  
6  
7  
8  
9  
10  
11  
12  
13  
14  
15  
16  
17  
18  
19  
20  
21  
22  
23  
24  
25  
26  
27  
28  
29  
30  
31  
32  
33  
34  
35  
36  
37  
38  
39  
40  
41  
42  
43  
44  
45  
46  
47  
48  
49

TABLE 2 – EMPIRICAL EVIDENCE LINKED TO NRES PARTICIPANT INFORMATION SHEET RECOMMENDED HEADINGS

| NRES Heading                                                                           | What does NRES say should be included?                                                                                                                                                                                    | N studies                | Empirical evidence for inclusion in PIS from literature                                                                                                                                                                                                                                                                                                                                                                                                                                                                                                                                                                                                                                                                                                                                                   |
|----------------------------------------------------------------------------------------|---------------------------------------------------------------------------------------------------------------------------------------------------------------------------------------------------------------------------|--------------------------|-----------------------------------------------------------------------------------------------------------------------------------------------------------------------------------------------------------------------------------------------------------------------------------------------------------------------------------------------------------------------------------------------------------------------------------------------------------------------------------------------------------------------------------------------------------------------------------------------------------------------------------------------------------------------------------------------------------------------------------------------------------------------------------------------------------|
| What is the purpose of the study?                                                      | Purpose is an important consideration for subjects and should be included                                                                                                                                                 | 2 <sup>32;34</sup>       | Pooled results showed that 76% (95% CI 27%;100%) participants wanted to know about study purpose                                                                                                                                                                                                                                                                                                                                                                                                                                                                                                                                                                                                                                                                                                          |
| Why have I been invited?                                                               | Why and how participants have been chosen and how many will be in the study                                                                                                                                               | 0                        | No empirical evidence                                                                                                                                                                                                                                                                                                                                                                                                                                                                                                                                                                                                                                                                                                                                                                                     |
| Do I have to take part? / What will happen if I don't want to carry on with the study? | The voluntary nature of the research should be included                                                                                                                                                                   | 4 <sup>21;23;32;34</sup> | Pooled results from the 3 quantitative studies [20, 31, 33] showed that 39% (95% CI 2%; 100%) participants wanted to know about voluntariness<br><br>The one qualitative study reported that it was the most important piece of information to be included in a participant information sheet [22]                                                                                                                                                                                                                                                                                                                                                                                                                                                                                                        |
| What will happen to me if I take part? / What will I have to do?                       | How long the participant will be involved in the research / how long the research will last                                                                                                                               | 3 <sup>21;32;34</sup>    | Pooled results from all three studies [20, 31, 33] showed that 61% (95% CI 16%;97%) participants wanted to know how long the research would last                                                                                                                                                                                                                                                                                                                                                                                                                                                                                                                                                                                                                                                          |
|                                                                                        | How often they need to attend a clinic                                                                                                                                                                                    | 1 <sup>21</sup>          | 68% (27/40; 95% CI 53%;82%) wanted to know the frequency of additional study visits [20]                                                                                                                                                                                                                                                                                                                                                                                                                                                                                                                                                                                                                                                                                                                  |
|                                                                                        | How long visits will be                                                                                                                                                                                                   | 0                        | No empirical evidence                                                                                                                                                                                                                                                                                                                                                                                                                                                                                                                                                                                                                                                                                                                                                                                     |
| Exactly what will happen to them                                                       |                                                                                                                                                                                                                           | 2 <sup>21;23</sup>       | Specific information types varied considerably between studies, so no meaningful pooled results could be calculated<br><br>The proportion of people wanting to know what would happen to them ranged from 9.5% (2/21; 95% CI 0%; 22.1%) [22] to 20% (8/40; 95%CI 7.6%; 32.4%) [20] depending on what the specific information was. For example, 20% (8/40; 95% CI 7.6%;32.4%) wanted to know about burdens to friends or family caused by study participation,[20] 12% (5/40; 95% CI 2.3%;22.8%) wanted to know how much work they would miss because of study participation,[20] 10% (4/40; 95% CI 0.7%;19.3%) wanted to know how much time would be spent waiting in clinic during study visits [20] and 9.5% (2/21; 95% CI -3%;22.1%) wanted to know practical information about trial procedures [22] |
|                                                                                        |                                                                                                                                                                                                                           |                          |                                                                                                                                                                                                                                                                                                                                                                                                                                                                                                                                                                                                                                                                                                                                                                                                           |
| Expenses and payments                                                                  | Expense claims available and if there is any kind of payment for participation                                                                                                                                            | 1 <sup>21</sup>          | 25% (10/40; 95% CI 11.6%;38.4%) wanted to know if free medication would be available during or after trial [20]                                                                                                                                                                                                                                                                                                                                                                                                                                                                                                                                                                                                                                                                                           |
| What is the drug, device or procedure that is being tested?                            | Short description of the drug, device or procedure and give the stage of development, state the dosage of the drug and method of administration, and details of any contraindicated drugs included over the counter drugs | Two <sup>21;22</sup>     | The one quantitative study [20] showed that specific questions about the medication regime ranged from 25% (10/40; 95% CI 11.5%;38.4%) that wanted to know what control they had over medication dose during the study to 70% (28/40; 95% CI 55.8%;84.2%) that wanted to know the frequency with which study medication must be taken.[20] The study also showed that 62% (25/40; 95% CI 47.5%;77.5%) wanted results of previous studies of safety and 45% (18/40; 95% CI 29.5%;60.4%) of efficacy, and 15% (6/40; 95% CI 3.9%;26.1%) wanted to know if study medication had been approved for clinical use [20]<br><br>The one qualitative study showed that participants wanted to know how to use the intervention [21]                                                                                |
| What are the alternatives for diagnosis or treatment?                                  | What other managements/treatments are available and a list of all important comparative risks and benefit                                                                                                                 | 1 <sup>23</sup>          | 5% (1/21; 95% CI 0%;13.9%) wanted as much information about treatment alternatives as they received about the study medication [22]                                                                                                                                                                                                                                                                                                                                                                                                                                                                                                                                                                                                                                                                       |



|                                           |                                                                                                                                       |                                                                                                                                                                                                                                                                                                                          |                         |                                                                                                                                                                                                                                                                                                                                                                                                                                                                                                                                                                                |
|-------------------------------------------|---------------------------------------------------------------------------------------------------------------------------------------|--------------------------------------------------------------------------------------------------------------------------------------------------------------------------------------------------------------------------------------------------------------------------------------------------------------------------|-------------------------|--------------------------------------------------------------------------------------------------------------------------------------------------------------------------------------------------------------------------------------------------------------------------------------------------------------------------------------------------------------------------------------------------------------------------------------------------------------------------------------------------------------------------------------------------------------------------------|
| 1<br>2<br>3<br>4<br>5<br>6<br>7<br>8<br>9 | What are the possible disadvantages and risks of taking part? / What are the side effects of any treatment received when taking part? | Any risks, discomforts or inconvenience should be outlined                                                                                                                                                                                                                                                               | 4 <sup>32;34</sup> 1622 | Specific information types varied considerably between studies so no meaningful pooled results could be calculated. Results ranged from no participants that asked about study risks (0/57) [31] to 97% (207/213; 95% CI 95%;99.4%) who wanted to be informed about any possible emotional or physical discomforts and side effects [33]                                                                                                                                                                                                                                       |
| 10<br>11<br>12                            | Radiation and the Ionizing Radiation Regulations                                                                                      | If the use of additional ionizing radiation is required as part of the study then information must be given to the participant on the radiation involved                                                                                                                                                                 | 0                       | No empirical evidence                                                                                                                                                                                                                                                                                                                                                                                                                                                                                                                                                          |
| 13<br>14<br>15                            | Harm to the unborn child: therapeutic studies                                                                                         | Clear warnings must be given where there could be harm to an unborn child, if there was a risk in breast feeding, or if taking the medication is likely to cause fertility problems                                                                                                                                      | 0                       | No empirical evidence                                                                                                                                                                                                                                                                                                                                                                                                                                                                                                                                                          |
| 16<br>17<br>18<br>19<br>20<br>21<br>22    | What are the possible benefits of taking part?                                                                                        | Benefits should be included, but where there is no intended clinical benefit it should be stated clearly                                                                                                                                                                                                                 | 3 <sup>22;32;34</sup>   | Pooled results of the two quantitative studies [31, 33] suggest that 57% (95% CI 7%; 98%) wanted to know about study benefits<br><br>Two studies provided relevant data relating to specific benefits.[20, 22] Specific requests ranged from 14% (3/21; 95% CI -0.7%;29.3%) that wanted to know about hopes for better treatment [22] to 55% (22/40; 95% CI 39.5%;70.4%) that wanted an opportunity to learn about condition or medication under study.[20] Specific information types varied considerably between studies so no meaningful pooled results could be calculated |
| 23<br>24<br>25<br>26<br>27<br>28          | What happens when the research study stops?                                                                                           | Arrangements for after the trial finishes must be given, and it must be clear if participants will have continued access to any benefits or intervention they may have obtained during the research. If treatment will not be available after the study, it should be explained what treatment will be available instead | 1 <sup>21</sup>         | 55% (22/40; 95% CI 39.6%;70.4%) wanted to know about the availability of medication after the study was over [20]                                                                                                                                                                                                                                                                                                                                                                                                                                                              |
| 29<br>30                                  | What if there is a problem?                                                                                                           | How complaints will be handled and what redress may be available                                                                                                                                                                                                                                                         | 0                       | No empirical evidence                                                                                                                                                                                                                                                                                                                                                                                                                                                                                                                                                          |
| 31<br>32<br>33                            | Will my taking part in the study be kept confidential?                                                                                | How data will be collected, stored, what it will be used for, who will have access to it, how long it will be retained for and how it will be disposed of                                                                                                                                                                | 2 <sup>32;34</sup>      | Pooled results showed that 44% (95% CI 10%; 82%) participants wanted to be given information about confidentiality and the protection of their privacy                                                                                                                                                                                                                                                                                                                                                                                                                         |
| 34<br>35                                  | Involvement of the GP/family doctor                                                                                                   | If the participants GP needs to be notified of involvement or asked for consent                                                                                                                                                                                                                                          | 0                       | No empirical evidence                                                                                                                                                                                                                                                                                                                                                                                                                                                                                                                                                          |
| 36<br>37<br>38<br>39                      | What will happen to any samples I give?                                                                                               | Clear description of whether new samples will be taken, if excess samples will be taken, and if access to existing stored samples will be required. The same type of information as for data is required to be provided                                                                                                  | 0                       | No empirical evidence                                                                                                                                                                                                                                                                                                                                                                                                                                                                                                                                                          |

|    |                                                        |                                                                                                                                                                                                    |                       |                                                                                                                                                                                                                         |
|----|--------------------------------------------------------|----------------------------------------------------------------------------------------------------------------------------------------------------------------------------------------------------|-----------------------|-------------------------------------------------------------------------------------------------------------------------------------------------------------------------------------------------------------------------|
| 1  |                                                        |                                                                                                                                                                                                    |                       |                                                                                                                                                                                                                         |
| 2  |                                                        |                                                                                                                                                                                                    |                       |                                                                                                                                                                                                                         |
| 3  |                                                        |                                                                                                                                                                                                    |                       |                                                                                                                                                                                                                         |
| 4  |                                                        |                                                                                                                                                                                                    |                       |                                                                                                                                                                                                                         |
| 5  | Will any genetic tests be done?                        | A separate consent form for genetic studies should be used                                                                                                                                         | 0                     | No empirical evidence                                                                                                                                                                                                   |
| 6  |                                                        |                                                                                                                                                                                                    |                       |                                                                                                                                                                                                                         |
| 7  | What will happen to the results of the research study? | What will happen to the results of the research, if it is intended to be published and how results will be made available to participants, and that they will not be identified in any publication | 3 <sup>25,26,33</sup> | Pooled results showed that 91% (95% CI 85%; 95%) wanted to know about study results                                                                                                                                     |
| 8  |                                                        |                                                                                                                                                                                                    |                       |                                                                                                                                                                                                                         |
| 9  |                                                        |                                                                                                                                                                                                    |                       |                                                                                                                                                                                                                         |
| 10 |                                                        |                                                                                                                                                                                                    |                       |                                                                                                                                                                                                                         |
| 11 |                                                        |                                                                                                                                                                                                    |                       |                                                                                                                                                                                                                         |
| 12 |                                                        |                                                                                                                                                                                                    |                       |                                                                                                                                                                                                                         |
| 13 | Who is organising and funding the research?            | The organization or company sponsoring the research and funding the research if these are different, and if the researcher conducting the research is being paid                                   | 6 <sup>24,27-31</sup> | Pooled results from the four quantitative studies showed that 48% (95% CI 27%;69%) wanted to know about any type of Col, but there was general disagreement over whether patients wanted to be told about financial Col |
| 14 |                                                        |                                                                                                                                                                                                    |                       |                                                                                                                                                                                                                         |
| 15 |                                                        |                                                                                                                                                                                                    |                       |                                                                                                                                                                                                                         |
| 16 |                                                        |                                                                                                                                                                                                    |                       |                                                                                                                                                                                                                         |
| 17 |                                                        |                                                                                                                                                                                                    |                       |                                                                                                                                                                                                                         |
| 18 |                                                        |                                                                                                                                                                                                    |                       |                                                                                                                                                                                                                         |
| 19 |                                                        |                                                                                                                                                                                                    |                       |                                                                                                                                                                                                                         |
| 20 |                                                        |                                                                                                                                                                                                    |                       |                                                                                                                                                                                                                         |
| 21 |                                                        |                                                                                                                                                                                                    |                       |                                                                                                                                                                                                                         |
| 22 |                                                        |                                                                                                                                                                                                    |                       |                                                                                                                                                                                                                         |
| 23 |                                                        |                                                                                                                                                                                                    |                       |                                                                                                                                                                                                                         |
| 24 |                                                        |                                                                                                                                                                                                    |                       |                                                                                                                                                                                                                         |
| 25 |                                                        |                                                                                                                                                                                                    |                       |                                                                                                                                                                                                                         |
| 26 |                                                        |                                                                                                                                                                                                    |                       |                                                                                                                                                                                                                         |
| 27 |                                                        |                                                                                                                                                                                                    |                       |                                                                                                                                                                                                                         |
| 28 |                                                        |                                                                                                                                                                                                    |                       |                                                                                                                                                                                                                         |
| 29 |                                                        |                                                                                                                                                                                                    |                       |                                                                                                                                                                                                                         |
| 30 |                                                        |                                                                                                                                                                                                    |                       |                                                                                                                                                                                                                         |
| 31 | Who has reviewed the study?                            | Explain the role of the Research Ethics Committees and which Committee reviewed the current study                                                                                                  | 1 <sup>32</sup>       | No participants asked about institutional review board approval (0/57) [31]                                                                                                                                             |
| 32 |                                                        |                                                                                                                                                                                                    |                       |                                                                                                                                                                                                                         |
| 33 |                                                        |                                                                                                                                                                                                    |                       |                                                                                                                                                                                                                         |
| 34 |                                                        |                                                                                                                                                                                                    |                       |                                                                                                                                                                                                                         |
| 35 |                                                        |                                                                                                                                                                                                    |                       |                                                                                                                                                                                                                         |
| 36 |                                                        |                                                                                                                                                                                                    |                       |                                                                                                                                                                                                                         |
| 37 |                                                        |                                                                                                                                                                                                    |                       |                                                                                                                                                                                                                         |
| 38 |                                                        |                                                                                                                                                                                                    |                       |                                                                                                                                                                                                                         |
| 39 |                                                        |                                                                                                                                                                                                    |                       |                                                                                                                                                                                                                         |
| 40 |                                                        |                                                                                                                                                                                                    |                       |                                                                                                                                                                                                                         |
| 41 |                                                        |                                                                                                                                                                                                    |                       |                                                                                                                                                                                                                         |
| 42 |                                                        |                                                                                                                                                                                                    |                       |                                                                                                                                                                                                                         |
| 43 |                                                        |                                                                                                                                                                                                    |                       |                                                                                                                                                                                                                         |
| 44 |                                                        |                                                                                                                                                                                                    |                       |                                                                                                                                                                                                                         |
| 45 |                                                        |                                                                                                                                                                                                    |                       |                                                                                                                                                                                                                         |
| 46 |                                                        |                                                                                                                                                                                                    |                       |                                                                                                                                                                                                                         |
| 47 |                                                        |                                                                                                                                                                                                    |                       |                                                                                                                                                                                                                         |
| 48 |                                                        |                                                                                                                                                                                                    |                       |                                                                                                                                                                                                                         |
| 49 |                                                        |                                                                                                                                                                                                    |                       |                                                                                                                                                                                                                         |

1  
2  
3 Of the 14 studies included in the review, three specifically considered the return of  
4 research results to participants and six considered only investigator conflicts of  
5 interest (Col). Five studies looked broadly at what information potential research  
6 participants wanted to know.  
7  
8  
9

10  
11  
12  
13  
14 Of the 20 sections of information NRES suggest should be included in a PIS, there  
15 were seven categories where no empirical evidence was identified that suggested  
16 what information research participants wanted to know (Table 2). No further themes,  
17 beyond the NRES categories, were identified. We were able to calculate pooled  
18 proportions for seven themes. Participants wanted to be told about dissemination of  
19 study results (91% [95% CI 85%; 95%]), investigator conflicts of interest (48% [95%  
20 CI 27%;69%]), the purpose of the study (76% [95% CI 27%;100%]), voluntariness  
21 (39% [95% CI 2%; 100%]), how long the research would last (61% [95% CI  
22 16%;97%]), benefits (57% [95% CI 7%; 98%]) and confidentiality (44% [95% CI 10%;  
23 82%]). Although the majority of participants appeared to want information for most of  
24 these themes, some participants did not, and the level of detail that participants  
25 wanted was not explored comprehensively.  
26  
27  
28  
29  
30  
31  
32  
33  
34  
35  
36  
37  
38  
39  
40  
41  
42  
43  
44  
45  
46  
47  
48  
49  
50  
51  
52  
53  
54  
55  
56  
57  
58  
59  
60

## Discussion

Of the 14 papers that met inclusion criteria, five looked broadly at what information research participants wanted to know. These studies focused on the category of information required rather than how much detail participants wanted. All 14 studies had substantial limitations to generalisability when applied to the wider research population because, for example, they focused on specific sub sections of the population, e.g. six studies included only cancer patients [22, 24, 25, 27, 32, 33] and only one study conducted in the UK.[33] A number of studies included only females [21, 24, 25, 33] and participants that were mostly white [24, 32] and well educated [27, 29, 32].

In the absence of empirical evidence to suggest what information potential research participants want, NRES have based their guidance on expert opinion. It does, however, mean that current information provision for research may not adequately address the informational needs of the general population, or 'hard to reach' groups such as socially deprived or black and minority ethnic groups. Whilst NRES recognise that one size does not fit all and that low risk studies with little or no intervention may need shorter information sheets, there is little empirical evidence to identify what level of information provision should be made.[34] A potential difficulty in conducting research to determine what should be included in a PIS is that an individual's information preferences may change as they move from being a potential to actual participant.[35, 36]

Responding to individuals' information needs may prove challenging, but the provision of high quality, appropriate information in a timely manner is crucial to the

1  
2  
3 consent process. Electronic information provision may be one way to address  
4  
5 different information needs. Recent research by Antoniou *et al.*[37] that allowed  
6  
7 participants to access three increasingly detailed levels of information electronically,  
8  
9 found that the basic level of information was accessed by 70 to 82% of participants,  
10  
11 but only 9 to 18% accessed the level of information currently recommended in NRES  
12  
13 guidance, and only 3 to 12% accessed all three levels of information. Interestingly,  
14  
15 20% (93/552) participants said they wanted more information even though fewer  
16  
17 than this (3-12%) read all of the information available to them.  
18  
19

20  
21  
22  
23 The study by Antoniou *et al.*[37] is an important first step in determining what  
24  
25 information potential research participants really want to know when they agree to  
26  
27 take part in a study. Further research is required to assess the feasibility and  
28  
29 acceptability of unfolding electronic information sheets.  
30  
31

### 32 33 34 **Limitations**

35  
36 Ideally, differences in informational requirements for sub groups of the population  
37  
38 would have been explored but the small numbers of studies identified and limited  
39  
40 data extracted from papers meant this was not feasible.  
41  
42

### 43 44 45 **Conclusions**

46  
47  
48 There is limited empirical evidence as to what information potential participants want  
49  
50 to know at the time they are deciding whether or not to participate in research. Real  
51  
52 time studies need to be conducted to explore what information potential participants  
53  
54 access when given a choice. This will enable us to determine exactly what  
55  
56

1  
2  
3  
4  
5  
6  
7  
8  
9  
10  
11  
12  
13  
14  
15  
16  
17  
18  
19  
20  
21  
22  
23  
24  
25  
26  
27  
28  
29  
30  
31  
32  
33  
34  
35  
36  
37  
38  
39  
40  
41  
42  
43  
44  
45  
46  
47  
48  
49  
50  
51  
52  
53  
54  
55  
56  
57  
58  
59  
60

information research participants want to know, and could, in addition to other sources such as expert opinion, help tailor PIS towards specific population sub groups and enable appropriate, high quality information to be provided to meet individual needs.

For peer review only

### Copyright/licence for publication

The Corresponding Author has the right to grant on behalf of all authors and does grant on behalf of all authors, an exclusive licence on a worldwide basis to the BMJ Publishing Group Ltd and its licensees, to permit this article (if accepted) to be published in BMJ editions and any other BMJPG products and to exploit all subsidiary rights, as set out in the BMJPG licence.

### Competing Interests

All authors have completed the Unified Competing Interest form at [www.icmje.org/coi\\_disclosure.pdf](http://www.icmje.org/coi_disclosure.pdf) (available on request from the corresponding author) and declare that (1) HK, MC, HD, TK, SW have support from the University of Birmingham for the submitted work; (2) HK, MC, HD, TK, SW have no relationships with any companies that might have an interest in the submitted work in the previous 3 years; (3) their spouses, partners, or children have no financial relationships that may be relevant to the submitted work; and (4) HK, MC, HD, TK, SW have no non-financial interests that may be relevant to the submitted work.

HD is an author of one of the papers included discussion [37]. SW was also acknowledged in this paper for comments on an early draft.

### Details of contributors

1  
2  
3 HK, MC, SW and HD conceived and designed the research. HK and TK collected,  
4  
5 validated and extracted data. All authors made substantial contribution to the  
6  
7 analysis and interpretation of the data. HK drafted the manuscript and SW, HD, MC  
8  
9 and TK revised it.  
10

### 11 12 13 14 15 16 **Ethical approval**

17  
18  
19  
20  
21 No identifiable personal information has been included in this study.  
22  
23

24  
25 Ethical approval was not required for this systematic review.  
26  
27  
28  
29  
30  
31

### 32 **Funding**

33  
34  
35  
36 The study was funded by the Medical Research Council Midland Hub for Trials  
37  
38 Methodology Research (Medical Research Council Grant ID G0800808).  
39  
40  
41

42  
43 The study sponsor had no role in study design, collection, analysis or interpretation  
44  
45 of data, in the writing of the report, or in the decision to submit the article for  
46  
47 publication.  
48  
49  
50

51  
52 HK and TK are PhD students funded by and MC is Education Lead for the Medical  
53  
54 Research Council Midland Hub for Trials Research Methodology.  
55  
56  
57



## Data

All authors had full access to all of the data in the study and can take responsibility for the integrity of the data and the accuracy of the data analysis.

## Data sharing statement

Technical appendix and dataset available from the corresponding author at [hmk592@bham.ac.uk](mailto:hmk592@bham.ac.uk).

Referenced Manager (Version 12) was used to analyse data. Stats Direct was used to calculate pooled proportions with random effects.

## Supplemental files

Search strategy (appendix 1)

## Reference List

- (1) The World Medical Association. The World Medical Association Declaration of Helsinki. Ethical principles for medical research involving human subjects. 2008.
- (2) General Medical Council. Seeking patients' consent: The ethical considerations. 1998.
- (3) Joffe S, Cook EF, Cleary PD et al. Quality of informed consent: a new measure of understanding among research subjects. *JNCI* 2001; **93**(2):139-147.
- (4) NHS East of England. NHS Values.  
[http://www.eoe.nhs.uk/nhs\\_constitution/values.php](http://www.eoe.nhs.uk/nhs_constitution/values.php). Accessed 27-9-2010.
- (5) NHS East of England. Principles that guide the NHS.  
[http://www.eoe.nhs.uk/nhs\\_constitution/principles.php](http://www.eoe.nhs.uk/nhs_constitution/principles.php). Accessed 27-9-2010.
- (6) Manson N. Consent and Informed Consent. In: Ashcroft R, Dawson A, Draper.H et al, editors. *Principles of Health Care Ethics*. Second ed. Chichester: John Wiley & Sons Ltd; 2007. 298-303.
- (7) Hewlett S. Consent to clinical research--adequately voluntary or substantially influenced? *JME* 1996; **22**(4):232-237.
- (8) Idanpaan-Heikkila JE. WHO guidelines for good clinical practice (GCP) for trials on pharmaceutical products: responsibilities of the investigator. *Ann Med* 1994; **26**(2):89-94.
- (9) Doyal L, Tobias J. *Informed Consent in Medical Research*. 1st ed. London: BMJ Books; 2001.

- 1  
2  
3 (10) National Research Ethics Service, National Research Ethics Service.  
4 Information Sheets and Consent Forms Guidance for Researchers and  
5 Reviewers. 2009.  
6  
7  
8  
9  
10 (11) Wager E, Tooley PJ, Emanuel MB et al. How to do it. Get patients' consent to  
11 enter clinical trials. BMJ 1995; **311(7007)**:734-737.  
12  
13  
14 (12) World Health Organisation. Guidelines for good clinical practice (GCP) for  
15 trials on pharmaceutical products. 1995.  
16  
17  
18 (13) National Cancer Institute, U.S. National Institutes of Health. A Guide to  
19 Understanding Informed Consent. [http://www cancer](http://www.cancer.gov/clinicaltrials/conducting/informed-consent-guide/allpages)  
20 [gov/clinicaltrials/conducting/informed-consent-guide/allpages](http://www.cancer.gov/clinicaltrials/conducting/informed-consent-guide/allpages). Accessed 05-  
21 06-2009  
22  
23  
24  
25  
26  
27 (14) Davis T, Holcombe R, Berkel H et al. Informed Consent for Clinical Trials: a  
28 Comparative Study of Standard Versus Simplified Forms. JNCI 1998;  
29 **90(9)**:668-674.  
30  
31  
32  
33  
34 (15) Fortun P, West J, Chalkley L et al. Recall of informed consent information by  
35 healthy volunteers in clinical trials. QJM 2008; **101(8)**:625-629.  
36  
37  
38 (16) Grossman S, Piantadosi S, Covahey C. Are informed consent forms that  
39 describe clinical oncology research protocols readable by most patients and  
40 their families? J. Clin. Oncol. 1994; **12(10)**:2211-2215.  
41  
42  
43  
44  
45 (17) Priestley K, Campbell C, Valentine C et al. Are patient consent forms for  
46 research protocols easy to read? BMJ 1992; **305**:1263-1254.  
47  
48  
49 (18) Lynoe N, Hoeyer K. Quantitative aspects of informed consent: considering the  
50 dose response curve when estimating quantity of information. J Med Ethics  
51 2005; **31**:736-738.  
52  
53  
54  
55  
56  
57  
58  
59  
60

- 1  
2  
3 (19) Sharpe N. Clinical Trials and the Real World: Selection Bias and  
4 Generalisability of Trial Results. *Cardiovasc. Drugs Ther.* 2002; 16:75-77.  
5  
6  
7 (20) Casarett D, Karlawish J, Sankar P et al. Obtaining informed consent for  
8 clinical pain research: patients' concerns and information needs. *Pain* 2001;  
9 **92(1-2)**:71-79.  
10  
11  
12 (21) Bento SF, Hardy E, Osis MJ. Process for obtaining informed consent:  
13 women's opinions. *Developing World Bioeth* 2008; **8(3)**:197-206.  
14  
15  
16 (22) Sand K, Loge JH, Berger O et al. Lung cancer patients' perceptions of  
17 informed consent documents. *Patient Educ Couns* 2008; **73(2)**:313-317.  
18  
19  
20 (23) Gray SW, Hlubocky FJ, Ratain MJ et al. Attitudes toward research  
21 participation and investigator conflicts of interest among advanced cancer  
22 patients participating in early phase clinical trials. *J. Clin. Oncol.* 2007;  
23 **25(23)**:3488-3494.  
24  
25  
26 (24) Partridge AH, Wong JS, Knudsen K et al. Offering participants results of a  
27 clinical trial: sharing results of a negative study. *Lancet* 2005; **365(9463)**:963-  
28 964.  
29  
30  
31 (25) Partridge AH, Burstein HJ, Gelman RS et al. Do patients participating in  
32 clinical trials want to know study results? *JNCI* 2003; **95(6)**:491-492.  
33  
34  
35 (26) Grady C, Horstmann E, Sussman JS et al. The limits of disclosure: what  
36 research subjects want to know about investigator financial interests. *J Law*  
37 *Med Ethics* 2000; **34(3)**:592-599.  
38  
39  
40 (27) Hampson LA, Agrawal M, Joffe S et al. Patients' views on financial conflicts of  
41 interest in cancer research trials. *N. Engl. J. Med.* 2006; **355(22)**:2330-2337.  
42  
43  
44 (28) Hutchinson A, Rubinfeld AR. Financial disclosure and clinical research: what  
45 is important to participants? *Med. J. Aust.* 2008; **189(4)**:207-209.  
46  
47  
48  
49  
50  
51  
52  
53  
54  
55  
56  
57  
58  
59  
60

- 1  
2  
3 (39) Weinfurt KP, Friedman JY, Allsbrook JS et al. Views of potential research  
4 participants on financial conflicts of interest: barriers and opportunities for  
5 effective disclosure. *J Gen Intern Med* 2006; **21(9)**:901-906.  
6  
7  
8  
9  
10 (30) Kim SY, Millard RW, Nisbet P et al. Potential research participants' views  
11 regarding researcher and institutional financial conflicts of interest. *J Med*  
12 *Ethics* 2004; **30(1)**:73-79.  
13  
14  
15  
16 (31) Walkup J, Bock E. What do prospective research participants want to know?  
17 What do they assume they know already? *JERHRE* 2009; **4(2)**:59-63.  
18  
19  
20  
21 (32) Fernandez CV, Santor D, Weijer C et al. The return of research results to  
22 participants: pilot questionnaire of adolescents and parents of children with  
23 cancer. *Paediatr Blood Cancer* 2007; **48(4)**:441-446.  
24  
25  
26  
27 (33) Maslin A. A survey of the opinions on 'informed consent' of women currently  
28 involved in clinical trials within a breast unit. *Eur J of Cancer Care* 1994;  
29 **3(4)**:153-162.  
30  
31  
32  
33  
34 (34) Edgman-Levitan S, Cleary P. What information do consumers want and  
35 need? *Health Affair* 1996; **15(4)**:42-56.  
36  
37  
38  
39 (35) Wyke S, Entwistle V, France E et al. Information for choice: what people  
40 need, prefer and use. Report number 08/1710/153. 2011.  
41  
42  
43 (36) Manson NC. Why do patients want information if not to take part in decision  
44 making? *J Med Ethics* 2010; **36**:834-837.  
45  
46  
47 (37) Antoniou E, Draper H, Reed K et al. An empirical study on the preferred size  
48 of the participant information sheet in research. *J Med Ethics* 2011 2011; **37**:  
49 557-62  
50  
51  
52  
53  
54  
55  
56  
57  
58  
59  
60

## Appendix 1 – Search strategy

1. "research patient\*".mp. [mp=title, original title, abstract, name of substance word, subject heading word]
2. exp Patients/
3. "participant\*".mp. [mp=title, original title, abstract, name of substance word, subject heading word]
4. exp Research Subjects/
5. 1 or 2 or 3 or 4 or 5 or 6
6. exp Consent Forms/
7. "information leaflet\*".mp. [mp=title, original title, abstract, name of substance word, subject heading word]
8. "information sheet\*".mp. [mp=title, original title, abstract, name of substance word, subject heading word]
9. (consent adj4 form\*).mp. [mp=title, original title, abstract, name of substance word, subject heading word]
10. 8 or 9 or 10 or 11
11. exp Informed Consent/
12. exp Ethics, Research/
13. "medico legal".mp. [mp=title, original title, abstract, name of substance word, subject heading word]
14. "medicolegal".mp. [mp=title, original title, abstract, name of substance word, subject heading word]
15. exp Disclosure/
16. (informed adj4 consent\*).mp. [mp=title, original title, abstract, name of substance word, subject heading word]
17. (research adj4 ethic\*).mp. [mp=title, original title, abstract, name of substance word, subject heading word]
18. "disclos\*".mp. [mp=title, original title, abstract, name of substance word, subject heading word]
19. 13 or 14 or 15 or 16 or 17 or 18 or 19 or 20
20. "want to know".mp. [mp=title, original title, abstract, name of substance word, subject heading word]
21. "want\*".mp. [mp=title, original title, abstract, name of substance word, subject heading word]
22. "information\*".mp. [mp=title, original title, abstract, name of substance word, subject heading word]
23. "require\*".mp. [mp=title, original title, abstract, name of substance word, subject heading word]
24. "desire\*".mp. [mp=title, original title, abstract, name of substance word, subject heading word]
25. "need\*".mp. [mp=title, original title, abstract, name of substance word, subject heading word]
26. "choice\*".mp. [mp=title, original title, abstract, name of substance word, subject heading word]
27. 23 or 24 or 25 or 26 or 27 or 28
28. 7 and 21 and 29
29. 12 or 22 or 30
30. 31 and "Humans" [Subjects]

Figure 1 - Results of search strategy and identification of publications included in the review

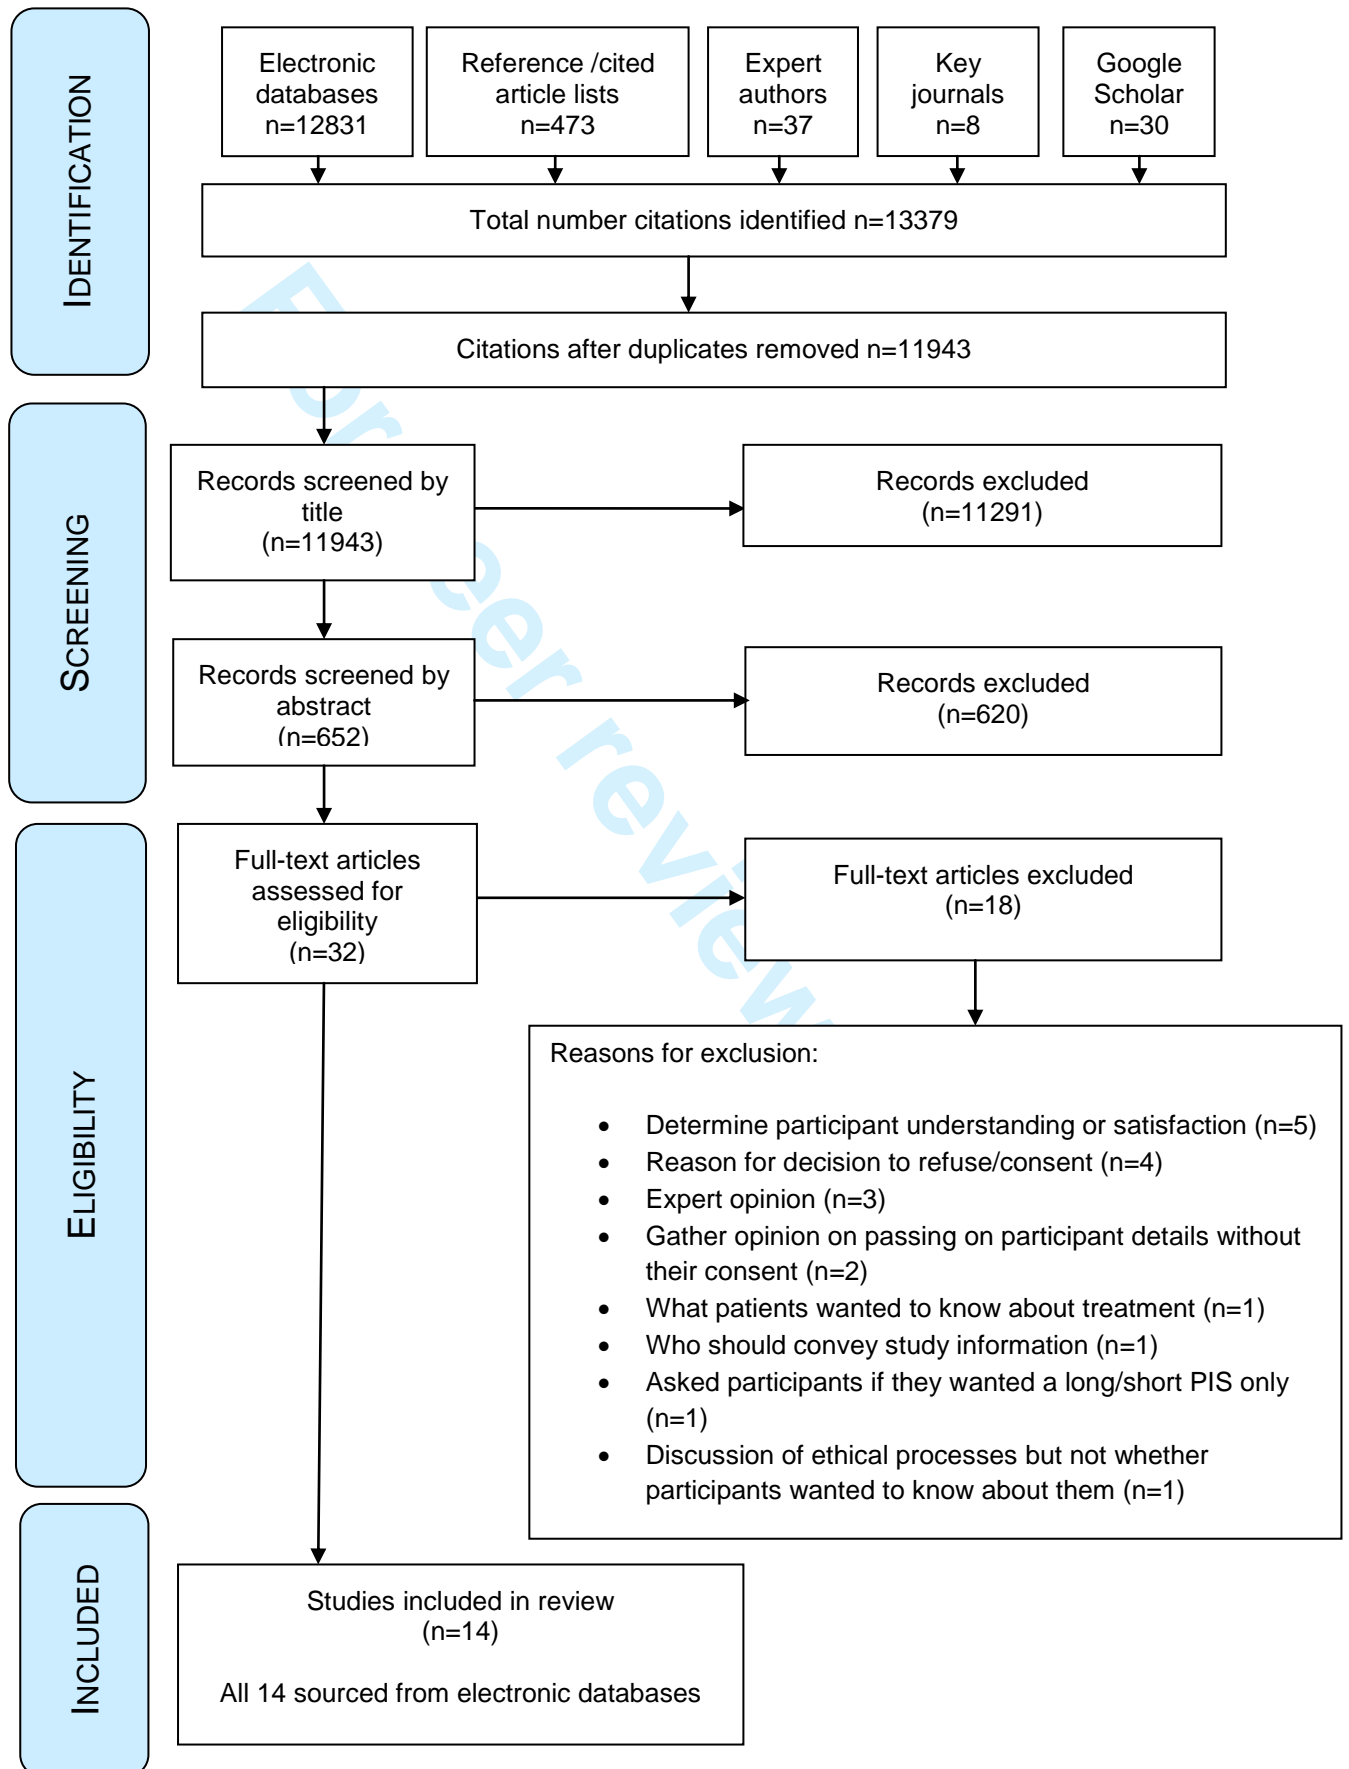

Supplement: bmjopen-2011-000509.draft_revisions.pdf [file bmjopen-2011-000509.draft_revisions.pdf]
