# Supplementary material for: What potential research participants want to know about research: a systematic review
Source: PubMed Central journal article supplement — BMJ Open. 2012 May 30;2(3):e000509. doi: 10.1136/bmjopen-2011-000509 (PMC3367142; doi:10.1136/bmjopen-2011-000509), 2012-05-30
Supplement: bmjopen-2011-000509-s1.pdf [file bmjopen-2011-000509-s1.pdf]

## Appendix 1 – Search strategy

1. "research patient\*".mp. [mp=title, original title, abstract, name of substance word, subject heading word]
2. exp Patients/
3. "participant\*".mp. [mp=title, original title, abstract, name of substance word, subject heading word]
4. exp Research Subjects/
5. 1 or 2 or 3 or 4 or 5 or 6
6. exp Consent Forms/
7. "information leaflet\*".mp. [mp=title, original title, abstract, name of substance word, subject heading word]
8. "information sheet\*".mp. [mp=title, original title, abstract, name of substance word, subject heading word]
9. (consent adj4 form\*).mp. [mp=title, original title, abstract, name of substance word, subject heading word]
10. 8 or 9 or 10 or 11
11. exp Informed Consent/
12. exp Ethics, Research/
13. "medico legal".mp. [mp=title, original title, abstract, name of substance word, subject heading word]
14. "medicolegal".mp. [mp=title, original title, abstract, name of substance word, subject heading word]
15. exp Disclosure/
16. (informed adj4 consent\*).mp. [mp=title, original title, abstract, name of substance word, subject heading word]
17. (research adj4 ethic\*).mp. [mp=title, original title, abstract, name of substance word, subject heading word]
18. "disclos\*".mp. [mp=title, original title, abstract, name of substance word, subject heading word]
19. 13 or 14 or 15 or 16 or 17 or 18 or 19 or 20
20. "want to know".mp. [mp=title, original title, abstract, name of substance word, subject heading word]
21. "want\*".mp. [mp=title, original title, abstract, name of substance word, subject heading word]
22. "information\*".mp. [mp=title, original title, abstract, name of substance word, subject heading word]
23. "require\*".mp. [mp=title, original title, abstract, name of substance word, subject heading word]
24. "desire\*".mp. [mp=title, original title, abstract, name of substance word, subject heading word]
25. "need\*".mp. [mp=title, original title, abstract, name of substance word, subject heading word]
26. "choice\*".mp. [mp=title, original title, abstract, name of substance word, subject heading word]
27. 23 or 24 or 25 or 26 or 27 or 28
28. 7 and 21 and 29
29. 12 or 22 or 30
30. 31 and "Humans" [Subjects]
